# Supplementary material for: Genome-Wide Association Study for Resistance to the <em>Meloidogyne javanica</em> Causing Root-Knot Nematode in Soybean
Source: Preprints.org preprint supplement (doi:10.20944/preprints201912.0093.v1), 2019-12-07
Supplement: Supplementary file 1 [file Supplementary Table 1 - Genotypes and Haplotypes.xlsx]

## Sheet: 317 accessions
Plant name	Origin	M. javanica	Chr13:30804961	chr13:30805499	Chr13:30805500	Chr13:30805508
PI 437127 B	United States	1.00	C	C	A	T
Bragg	United States	1.00	C	C	A	T
PI 595099	United States	1.00	C	C	A	T
CD 224	Brazil	1.30	C	C	A	T
BRSMG 850G RR	Brazil	1.50	C	C	A	T
CD 219 RR	Brazil	1.80	C	C	A	T
PI 506862	Japan	1.80	C	C	A	T
PI 437679	China	1.80	C	C	A	T
CD 201	Brazil	2.00	C	C	A	T
CD 225 RR	Brazil	2.00	T	A	G	G
PI 608357	United States	2.00	C	C	A	T
PI 89772	China	2.00	C	C	A	T
BRS 257	Brazil	2.20	C	C	A	T
PI 567214 B	Russia	2.20	C	C	A	T
CD 233 RR	Brazil	2.30	C	C	A	T
PI 567648 C	China	2.30	C	C	A	T
PI 253651 D	China	2.30	T	A	G	G
UFV10 (Uberaba)	Brazil	2.30	T	A	G	G
BRS 239	Brazil	2.30	T	A	G	G
PI 158765	China	2.30	C	C	A	T
BRS Juliana	Brazil	2.30	C	C	A	T
PI 588025	China	2.30	C	C	A	T
FC031683	United States	2.50	C	C	A	T
PI 438190	China	2.50	T	A	G	G
PI 424588	South Korea	2.50	T	A	G	G
PI 587911 A	China	2.50	C	C	A	T
PI 323556	India	2.50	C	C	A	T
PI 607380	United States	2.50	C	C	A	T
PI 230977	Japan	2.50	C	C	A	T
PI 634813	United States	2.50	C	C	A	T
BRS Galha	Brazil	2.50	C	C	A	T
PI 424557	South Korea	2.70	T	A	G	G
PI 561379 B	China	2.70	T	A	G	G
PI 200538	Japan	2.70	C	C	A	T
BRSMG 740 SRR	Brazil	2.70	C	C	A	T
PI 507089 B	Japan	2.70	C	C	A	T
TMG 1182 RR	Brazil	2.70	C	C	A	T
BRSMG Virtuosa	Brazil	2.70	C	C	A	T
PI 506848	Japan	2.80	T	A	G	G
MG/BR46 (Conquista)	Brazil	2.80	C	C	A	T
PI 432359	Mexico	2.80	C	C	A	T
PI 476885	Vietnan	2.80	C	C	A	T
PI 506705	Japan	2.80	C	C	A	T
PI 547672	United States	2.80	C	C	A	T
PI 438303	South Korea	2.80	C	C	A	T
PI 632421	United States	2.80	C	C	A	T
IAC 2	Brazil	2.80	C	C	A	T
BRS Raimunda	Brazil	3.00	C	C	A	T
PI 520733	South Korea	3.00	T	A	G	G
BRS 233	Brazil	3.00	C	C	A	T
PI 547475	United States	3.00	C	C	A	T
PI 495831	France	3.00	C	C	A	T
BRS Celeste	Brazil	3.00	C	C	A	T
PI 437819	China	3.00	T	A	G	G
PI 567045	Indonesia	3.00	C	C	A	T
UFV18 (Patos de Minas)	Brazil	3.00	C	C	A	T
PI 603568	China	3.00	T	A	G	G
PI 437341	Russia	3.00	C	C	A	T
PI 632428	United States	3.00	C	C	A	T
PI 507160	Japan	3.20	T	A	G	G
BRSMG 751 SRR	Brazil	3.20	T	A	G	G
M-SOY 7908 RR	Brazil	3.20	C	C	A	T
PI 594401 B	China	3.20	T	A	G	G
PI 424605 A	South Korea	3.20	T	A	G	G
PI 594470 C	China	3.20	T	A	G	G
BRS 278 RR	Brazil	3.20	C	C	A	T
BRSGO Mineiros	Brazil	3.20	C	C	A	T
PI 487431	Japan	3.20	C	C	A	T
PI 507072	Japan	3.20	T	A	G	G
PI 547420	United States	3.20	C	C	A	T
PI 548362	United States	3.20	C	C	A	T
PI 507073	Japan	3.20	T	A	G	G
OAC Aries	Canada	3.20	C	C	A	T
PI 573286	United States	3.20	C	C	A	T
PI 587958	China	3.20	C	C	A	T
PI 588028	China	3.20	C	C	A	T
PI 593956 A	China	3.20	T	A	G	G
PI 171432	China	3.20	T	A	G	G
PI 437912	China	3.20	T	A	G	G
BRS 278	Brazil	3.20	C	C	A	T
PI 657701	Nigeria	3.20	C	C	A	T
PI 179826	China	3.20	C	C	A	T
Embrapa 63 (Mirador)	Brazil	3.30	C	C	A	T
DELTAPINE 506	United States	3.30	C	C	A	T
PI 096280	North Korea	3.30	C	C	A	T
BRS 282	Brazil	3.30	C	C	A	T
BRS Milena	Brazil	3.30	T	A	G	G
PI 424099 A	South Korea	3.30	C	C	A	T
PI 547855	United States	3.30	C	C	A	T
V.MAX RR	Brazil	3.30	C	C	A	T
BRS 283	Brazil	3.30	C	C	A	T
PI 339868 B	South Korea	3.30	C	C	A	T
Embrapa 59	Brazil	3.30	T	A	G	G
PI 458294	South Korea	3.30	T	A	G	G
PI 458515	China	3.40	T	A	G	G
BRS Corisco	Brazil	3.40	C	C	A	T
PI 424085 A	South Korea	3.40	C	C	A	T
PI 437725	China	3.40	T	A	G	G
PI 533655	United States	3.40	C	C	A	T
Embrapa 4 (BR4RC)	Brazil	3.40	T	A	G	G
PI 437801	China	3.40	T	A	G	G
BRS 216	Brazil	3.50	C	C	A	T
PI 096118	North Korea	3.50	C	C	A	T
PI 253663	China	3.50	T	A	G	G
BRS Valiosa RR	Brazil	3.50	C	C	A	T
PI 424597	South Korea	3.50	T	A	G	G
PI 507571	Japan	3.50	T	A	G	G
PI 548542	United States	3.50	C	C	A	T
PI 549076 A	China	3.50	T	A	G	G
Santa Rosa	Brazil	3.50	C	C	A	T
PI 90490-2	China	3.50	C	C	A	T
PI 507443	Japan	3.50	T	A	G	G
PI 96280	North Korea	3.50	C	C	A	T
PI 171431	China	3.60	T	A	G	G
PI 438187	China	3.70	T	A	G	G
PI 578506	China	3.70	T	A	G	G
PI 507286 C	Japan	3.70	T	A	G	G
M-SOY 8527 RR	Brazil	3.70	C	C	A	T
PI 437636 B	China	3.70	T	A	G	G
PI 253654	China	3.70	T	A	G	G
PI 548493	Japan	3.70	T	A	G	G
PI 483253	Brazil	3.70	C	C	A	T
PI 458199	South Korea	3.70	T	A	G	G
PI 437829	China	3.70	T	A	G	G
PI 594544	China	3.70	T	A	G	G
PI 628889	Brazil	3.70	C	C	A	T
PI 646157	United States	3.70	C	C	A	T
PI 424558 A	South Korea	3.80	T	A	G	G
PI 437353	Russia	3.80	T	A	G	G
Ocepar 10	Brazil	3.80	T	A	G	G
M-SOY 8585 RR	Brazil	3.80	C	C	A	T
M-SOY 8849 RR	Brazil	3.80	C	C	A	T
PI 470226	China	3.80	T	A	G	G
PI 507317	Japan	3.80	T	A	G	G
PI 587618 A	China	3.80	T	A	G	G
PI 458175 C	South Korea	3.80	T	A	G	G
PI 547836	United States	3.80	C	C	A	T
PI 424506	South Korea	3.80	T	A	G	G
BRSMG 750 RR	Brazil	3.80	T	A	G	G
PI 507407	Japan	3.80	T	A	G	G
PI 507082 A	Japan	3.80	T	A	G	G
PI 424522	South Korea	3.80	T	A	G	G
PI 603200	United States	3.80	C	C	A	T
PI 458234	South Korea	3.80	T	A	G	G
PI 506590 E	Japan	3.80	T	A	G	G
DM-309	Brazil	3.80	T	A	G	G
PI 424523 B	South Korea	3.80	T	A	G	G
BR 16	Brazil	3.80	T	A	G	G
PI 634903	United States	3.80	C	C	A	T
PI 424554	South Korea	3.80	T	A	G	G
PI 507158	Japan	4.00	T	A	G	G
PI 507449	Japan	4.00	T	A	G	G
PI 567668	China	4.00	T	A	G	G
Ivai	Brazil	4.00	T	A	G	G
PI 424492	South Korea	4.00	T	A	G	G
PI 507492	Japan	4.00	T	A	G	G
PI 424495	South Korea	4.00	T	A	G	G
PI 506935	Japan	4.00	T	A	G	G
IAC 11	Brazil	4.00	T	A	G	G
PI 594403	China	4.00	T	A	G	G
PI 424499 D	South Korea	4.00	T	A	G	G
PI 437580	China	4.00	T	A	G	G
PI 200519	Japan	4.00	T	A	G	G
PI 437673	China	4.00	T	A	G	G
PI 507430	Japan	4.00	T	A	G	G
PI 612758 B	China	4.00	T	A	G	G
Tokyo	France	4.00	T	A	G	G
PI 507259	Japan	4.00	T	A	G	G
PI 437845 D	China	4.00	T	A	G	G
PI 458249	South Korea	4.00	T	A	G	G
BRSGO Edeia	Brazil	4.00	T	A	G	G
M-SOY 8248	Brazil	4.20	C	C	A	T
PI 587608 B	china	4.20	T	A	G	G
PI 248515	Japan	4.20	T	A	G	G
PI 506892	Japan	4.20	T	A	G	G
PI 438492	United States	4.20	T	A	G	G
PI 507501	Japan	4.20	T	A	G	G
BRSMG 250 (Nobreza)	Brazil	4.20	T	A	G	G
PI 424504 A	South Korea	4.20	T	A	G	G
PI 594596	China	4.20	T	A	G	G
PI 547856	United States	4.20	C	C	A	T
BR 27 (Cariri)	Brazil	4.20	T	A	G	G
PI 424511	South Korea	4.20	T	A	G	G
PI 594538 A	China	4.20	T	A	G	G
BRS Torena	Brazil	4.20	T	A	G	G
PI 506525	Japan	4.20	T	A	G	G
FTEureka	Brazil	4.20	T	A	G	G
M-SOY 8925	Brazil	4.20	T	A	G	G
PI 509079	South Korea	4.20	T	A	G	G
PI 458236 A	South Korea	4.20	T	A	G	G
PI 532455 B	China	4.20	T	A	G	G
PI 634335	United States	4.20	C	C	A	T
PI 593972	Japan	4.20	T	A	G	G
BRS Carla	Brazil	4.20	T	A	G	G
Embrapa 48	Brazil	4.30	T	A	G	G
M-SOY 8199	Brazil	4.30	T	A	G	G
PI 437350	Russia	4.30	T	A	G	G
PI 442010	South Korea	4.30	T	A	G	G
PI 442012 A	South Korea	4.30	T	A	G	G
Planalto	Brazil	4.30	T	A	G	G
PI 507316	Japan	4.30	T	A	G	G
PI 417234	Japan	4.30	T	A	G	G
PI 508296 A	South Korea	4.30	T	A	G	G
PI 561337	China	4.30	T	A	G	G
Embrapa 1 (IAS5 RC)	Brazil	4.30	T	A	G	G
BRSMG 800 A	Brazil	4.30	T	A	G	G
PI 507432	Japan	4.30	T	A	G	G
Embrapa 20 (Doko RC)	Brazil	4.30	T	A	G	G
PI 644103	Brazil	4.30	T	A	G	G
PI 398313	South Korea	4.30	T	A	G	G
M-SOY 9056 RR	Brazil	4.40	C	C	A	T
PI 506516	Japan	4.40	T	A	G	G
PI 157428	North Korea	4.40	T	A	G	G
PI 587991	China	4.40	T	A	G	G
BRSGO Caiapônia	Brazil	4.50	T	A	G	G
PI 458306 A	South Korea	4.50	T	A	G	G
BRS Candieiro	Brazil	4.50	T	A	G	G
BRSGO 8061	Brazil	4.50	T	A	G	G
BRSMG Renascença	Brazil	4.50	T	A	G	G
PI 442018	South Korea	4.50	T	A	G	G
PI 506989	Japan	4.50	T	A	G	G
PI 438442 A	Netherlands	4.50	T	A	G	G
PI 438255	China	4.50	T	A	G	G
CD 202	Brazil	4.50	T	A	G	G
BR 36	Brazil	4.50	T	A	G	G
FT10 (Princesa)	Brazil	4.50	T	A	G	G
PI 508296 G	South Korea	4.50	T	A	G	G
M-SOY 5942	Brazil	4.50	C	C	A	T
IAC 10	Brazil	4.50	T	A	G	G
PI 059845	Japan	4.50	T	A	G	G
PI 603694B	China	4.50	T	A	G	G
PI 054610-1	China	4.50	T	A	G	G
BRS Guapa	Brazil	4.50	T	A	G	G
PI 506789	Japan	4.50	T	A	G	G
Vicoja	Brazil	4.50	T	A	G	G
PI 424549 A	South Korea	4.50	T	A	G	G
IAS 5	Brazil	4.50	T	A	G	G
BRS Nova Savana	Brazil	4.50	T	A	G	G
PI 196170	South Korea	4.50	T	A	G	G
BRS 133	Brazil	4.50	T	A	G	G
PI 507153	Japan	4.50	T	A	G	G
PI 430596	China	4.50	T	A	G	G
MG/BR48 (Garimpo RCH)	Brazil	4.50	C	C	A	T
PI 467316	China	4.60	T	A	G	G
PI 304218	Taiwan	4.60	T	A	G	G
PI 437749	China	4.60	T	A	G	G
BRS 314	Brazil	4.70	T	A	G	G
Campos Gerais	Brazil	4.70	T	A	G	G
BRS 263 (Diferente)	Brazil	4.70	T	A	G	G
MT/BR45 (Paiaguas)	Brazil	4.70	T	A	G	G
IAC 100	Brazil	4.70	T	A	G	G
PI 398965	South Korea	4.70	T	A	G	G
M-SOY 7501	Brazil	4.70	T	A	G	G
BRS 217 (Flora)	Brazil	4.70	T	A	G	G
PI 253652 A	China	4.70	T	A	G	G
PI 522189	Maldova	4.70	T	A	G	G
PI 458226	South Korea	4.70	T	A	G	G
Perola	Brazil	4.70	T	A	G	G
TMG 121 RR	Brazil	4.70	C	C	A	T
PI 628827	Brazil	4.70	T	A	G	G
Ocepar 9	Brazil	4.70	T	A	G	G
PI 417580	Japan	4.70	T	A	G	G
PI 506833	Japan	4.70	T	A	G	G
PI 424555 B	South Korea	4.70	T	A	G	G
PI 437773	China	4.80	T	A	G	G
Davis	United States	4.80	T	A	G	G
PI 229325	Japan	4.80	T	A	G	G
Parana	Brazil	4.80	T	A	G	G
BRSGO 204 (Goiania)	Brazil	4.80	T	A	G	G
BRSMT Pintado	Brazil	4.80	T	A	G	G
BRS 218 (Nina)	Brazil	4.80	T	A	G	G
EMGOPA 301	Brazil	4.80	C	C	A	T
PI 587959	China	4.80	C	C	A	T
BRS 245 RR	Brazil	4.80	T	A	G	G
PI 507408	Japan	4.80	T	A	G	G
PI 561354	China	4.80	T	A	G	G
BRS 242 RR	Brazil	4.80	T	A	G	G
BRSMA Serido RCH	Brazil	4.80	T	A	G	G
BRS Sambaiba	Brazil	4.80	T	A	G	G
PI 430460 A	China	4.80	T	A	G	G
PI 518719	China	4.80	T	A	G	G
BRS Invernada	Brazil	4.80	T	A	G	G
PI 507097	Japan	4.80	T	A	G	G
PI 518720	China	4.80	T	A	G	G
PI 423945	Japan	4.80	T	A	G	G
PI 097038	North Korea	4.80	C	C	A	T
PI 424505	South Korea	4.80	T	A	G	G
PI 438304 B	North Korea	5.00	T	A	G	G
PI 091178	China	5.00	T	A	G	G
PI 458298	South Korea	5.00	T	A	G	G
BRSMT Uirapuru	Brazil	5.00	T	A	G	G
MT/BR53 (Tucano)	Brazil	5.00	T	A	G	G
PI 594775	China	5.00	T	A	G	G
PI 442005	United States	5.00	T	A	G	G
PI 507480	Japan	5.00	T	A	G	G
FMT Tucunaré	Brazil	5.00	T	A	G	G
PI 398666	South Korea	5.00	T	A	G	G
PI 398887	South Korea	5.00	T	A	G	G
PI 437486	China	5.00	T	A	G	G
PI 399020	South Korea	5.00	T	A	G	G
BRSGO Iara	Brazil	5.00	T	A	G	G
BRS 214	Brazil	5.00	T	A	G	G
Ocepar 8	Brazil	5.00	T	A	G	G
M-SOY 8870	Brazil	5.00	C	C	A	T
PI 509075	South Korea	5.00	T	A	G	G
Ocepar 12	Brazil	5.00	T	A	G	G
BRS Baliza RR	Brazil	5.00	T	A	G	G
PI 374189	India	5.00	T	A	G	G
Mineira	Brazil	5.00	T	A	G	G
BRS 185	Brazil	5.00	T	A	G	G
PI 171454	Japan	5.00	T	A	G	G
PI 438048 B	China	5.00	T	A	G	G
BRS Sinuelo	Brazil	5.00	T	A	G	G
PI 506819	Japan	5.00	T	A	G	G
PI 438302 A	Russia	5.00	T	A	G	G
BRSMG Confianca	Brazil	5.00	T	A	G	G
BRS Petala	Brazil	5.00	T	A	G	G

## Sheet: Table - Hap from GWAS
Haplotype ID	Position in the Soybean Genome - Chromosome 13				M. javanica reaction
	30804961	30805499	30805500	30805508	R	MR	S
Hap1	C	C	A	T	25	54	20
Hap2	T	A	G	G	6	28	184
Total					31	82	204

## Sheet: Resistant Accessions - USDA
Plant ID	Chr13:30804961	Chr13:30805508
AC-2001	C	T
AC-Albatros	C	T
AC-Brant	C	T
AC-Cormoran	C	T
AC-Harmony	C	T
alta	C	T
Archer	C	T
Blackjack-21	C	T
Dwight	C	T
E00003	C	T
evans	C	T
FC29333	C	T
FC31416	C	T
FC31571	C	T
FC31572	C	T
FC31683	C	T
FC31684	C	T
FC31685	C	T
FC31697	C	T
FC31702	C	T
FC31721	C	T
FC31731	C	T
FC31934	C	T
FC32176	C	T
FC4002B	C	T
IA2007	C	T
IA3004	C	T
LG91N7350R	C	T
OAC-Sparta	C	T
OAC-Stratford	C	T
Peking	C	T
PI123440	C	T
PI153309	C	T
PI157422	C	T
PI157473	C	T
PI157475	C	T
PI157478	C	T
PI158765	C	T
PI163453	C	T
PI165674	C	T
PI171427	C	T
PI200459	C	T
PI200491	C	T
PI200538	C	T
PI205909	C	T
PI208785	C	T
PI212716	C	T
PI221716	C	T
PI224269	C	T
PI227687	C	T
PI229337	C	T
PI229738	C	T
PI230975	C	T
PI230976	C	T
PI230977	C	T
PI245331	C	T
PI253651A	C	T
PI253664	C	T
PI263044	C	T
PI279648	C	T
PI284873	C	T
PI285093	C	T
PI310441	C	T
PI322689	C	T
PI323556	C	T
PI324066	C	T
PI324924	C	T
PI330633	C	T
PI330635	C	T
PI339732	C	T
PI339735B	C	T
PI339868B	C	T
PI342434	C	T
PI342619A	C	T
PI342619B	C	T
PI342620B	C	T
PI346298	C	T
PI346305	C	T
PI346308	C	T
PI347546A	C	T
PI347546B	C	T
PI347552C	C	T
PI347559A	C	T
PI347559B	C	T
PI358315A	C	T
PI358321A	C	T
PI358321B	C	T
PI358321C	C	T
PI358322	C	T
PI358323	C	T
PI360957	C	T
PI361066A	C	T
PI361066B	C	T
PI366121	C	T
PI366122	C	T
PI366123	C	T
PI371607	C	T
PI371610	C	T
PI371611	C	T
PI372416A	C	T
PI374220	C	T
PI374221	C	T
PI376844	C	T
PI377573	C	T
PI377575	C	T
PI377577	C	T
PI377578	C	T
PI378684A	C	T
PI378686B	C	T
PI378688	C	T
PI378691	C	T
PI378692	C	T
PI378693B	C	T
PI378694	C	T
PI378695B	C	T
PI378696A	C	T
PI378696B	C	T
PI378697B	C	T
PI378698	C	T
PI378699A	C	T
PI378699B	C	T
PI378701B	C	T
PI391587	C	T
PI393551	C	T
PI393565A	C	T
PI398238	C	T
PI398594	C	T
PI398631	C	T
PI398633	C	T
PI398881	C	T
PI404166	C	T
PI404167	C	T
PI404188A	C	T
PI404189	C	T
PI407018	C	T
PI407019	C	T
PI407020	C	T
PI407023	C	T
PI407024	C	T
PI407026	C	T
PI407027	C	T
PI407029	C	T
PI407031	C	T
PI407032A	C	T
PI407032B	C	T
PI407037	C	T
PI407040	C	T
PI407041	C	T
PI407050	C	T
PI407051	C	T
PI407052	C	T
PI407055	C	T
PI407056	C	T
PI407063	C	T
PI407064	C	T
PI407066	C	T
PI407070	C	T
PI407071	C	T
PI407072	C	T
PI407073	C	T
PI407074	C	T
PI407076	C	T
PI407077	C	T
PI407081	C	T
PI407084	C	T
PI407087	C	T
PI407091	C	T
PI407092	C	T
PI407093	C	T
PI407094	C	T
PI407100	C	T
PI407103	C	T
PI407104	C	T
PI407105	C	T
PI407108	C	T
PI407111	C	T
PI407112	C	T
PI407114	C	T
PI407127	C	T
PI407128	C	T
PI407129	C	T
PI407137	C	T
PI407156	C	T
PI407162	C	T
PI407194	C	T
PI407196	C	T
PI407197	C	T
PI407203	C	T
PI407217	C	T
PI407218	C	T
PI407234	C	T
PI407235	C	T
PI407237	C	T
PI407244	C	T
PI407246	C	T
PI407247	C	T
PI407252	C	T
PI407253	C	T
PI407254	C	T
PI407255	C	T
PI407257	C	T
PI407259	C	T
PI407260	C	T
PI407268	C	T
PI407269	C	T
PI407272	C	T
PI407286	C	T
PI407287	C	T
PI407289	C	T
PI407301	C	T
PI407302	C	T
PI407309A	C	T
PI407309B	C	T
PI407313	C	T
PI407315	C	T
PI407318A	C	T
PI407730	C	T
PI407731	C	T
PI407736	C	T
PI408045	C	T
PI408076C	C	T
PI416806	C	T
PI416811	C	T
PI416825A	C	T
PI416825B	C	T
PI416826A	C	T
PI416880B	C	T
PI416922	C	T
PI417011	C	T
PI417026	C	T
PI417084A	C	T
PI417084B	C	T
PI417085	C	T
PI417088	C	T
PI417275	C	T
PI417386	C	T
PI417428	C	T
PI417502	C	T
PI417575	C	T
PI419043	C	T
PI423743A	C	T
PI423743C	C	T
PI423958	C	T
PI423988	C	T
PI423989A	C	T
PI423989B	C	T
PI423990B	C	T
PI423991	C	T
PI423993	C	T
PI423994	C	T
PI423995	C	T
PI423996	C	T
PI424003	C	T
PI424004A	C	T
PI424004B	C	T
PI424017A	C	T
PI424017B	C	T
PI424022A	C	T
PI424024	C	T
PI424027A	C	T
PI424038A	C	T
PI424038B	C	T
PI424039A	C	T
PI424039B	C	T
PI424040	C	T
PI424041	C	T
PI424042	C	T
PI424043A	C	T
PI424044	C	T
PI424045	C	T
PI424046A	C	T
PI424047	C	T
PI424048	C	T
PI424049	C	T
PI424050	C	T
PI424051A	C	T
PI424051B	C	T
PI424052	C	T
PI424053	C	T
PI424054A	C	T
PI424054B	C	T
PI424056	C	T
PI424069	C	T
PI424070A	C	T
PI424070B	C	T
PI424071	C	T
PI424075	C	T
PI424076A	C	T
PI424076B	C	T
PI424077	C	T
PI424079	C	T
PI424080	C	T
PI424081B	C	T
PI424083A	C	T
PI424083B	C	T
PI424085A	C	T
PI424085B	C	T
PI424090	C	T
PI424093	C	T
PI424098	C	T
PI424099A	C	T
PI424100A	C	T
PI424101	C	T
PI424102A	C	T
PI424103A	C	T
PI424103B	C	T
PI424106B	C	T
PI424107A	C	T
PI424107B	C	T
PI424110	C	T
PI424122	C	T
PI424159B	C	T
PI424191	C	T
PI424195A	C	T
PI424195B	C	T
PI424405A	C	T
PI424405B	C	T
PI424514	C	T
PI424585	C	T
PI424595	C	T
PI424610	C	T
PI424611A	C	T
PI424611B	C	T
PI424612	C	T
PI427139	C	T
PI430600A	C	T
PI430736	C	T
PI430737	C	T
PI432359	C	T
PI434980A	C	T
PI437105C	C	T
PI437106	C	T
PI437109C	C	T
PI437110A	C	T
PI437127A	C	T
PI437127B	C	T
PI437136	C	T
PI437156B	C	T
PI437197	C	T
PI437341	C	T
PI437401	C	T
PI437578	C	T
PI437614A	C	T
PI437630C	C	T
PI437661B	C	T
PI437662	C	T
PI437679	C	T
PI437734	C	T
PI437788B	C	T
PI437789	C	T
PI437790	C	T
PI437794	C	T
PI437805	C	T
PI438034	C	T
PI438073	C	T
PI438075	C	T
PI438282A	C	T
PI438303	C	T
PI438329	C	T
PI438335	C	T
PI438470	C	T
PI438495	C	T
PI438497	C	T
PI438500	C	T
PI445830	C	T
PI445834	C	T
PI445837	C	T
PI445842	C	T
PI445847	C	T
PI459024	C	T
PI464877	C	T
PI464889A	C	T
PI464889B	C	T
PI464889C	C	T
PI464935	C	T
PI464936A	C	T
PI464939A	C	T
PI464939B	C	T
PI467340	C	T
PI468397A	C	T
PI468397B	C	T
PI468400A	C	T
PI468906	C	T
PI468912	C	T
PI468913	C	T
PI468916	C	T
PI468918	C	T
PI475783B	C	T
PI475813A	C	T
PI475813B	C	T
PI475820	C	T
PI475828	C	T
PI476345	C	T
PI476349	C	T
PI476352A	C	T
PI476879	C	T
PI476883	C	T
PI476885	C	T
PI476895	C	T
PI476904	C	T
PI476907	C	T
PI476909	C	T
PI476912	C	T
PI476914	C	T
PI476916	C	T
PI476918	C	T
PI476920	C	T
PI476925	C	T
PI476928	C	T
PI476934	C	T
PI479746B	C	T
PI479750	C	T
PI479759	C	T
PI483071A	C	T
PI483253	C	T
PI486328	C	T
PI486330	C	T
PI486332	C	T
PI487428	C	T
PI487429	C	T
PI487430	C	T
PI487431	C	T
PI490766	C	T
PI495831	C	T
PI495832	C	T
PI504287A	C	T
PI504287B	C	T
PI504290	C	T
PI504486	C	T
PI506417	C	T
PI506476	C	T
PI506534	C	T
PI506545	C	T
PI506632	C	T
PI506633	C	T
PI506696	C	T
PI506705	C	T
PI506825	C	T
PI506840B	C	T
PI506862	C	T
PI506886	C	T
PI506959	C	T
PI507024	C	T
PI507041	C	T
PI507043	C	T
PI507046	C	T
PI507137	C	T
PI507138	C	T
PI507145	C	T
PI507147	C	T
PI507188	C	T
PI507298	C	T
PI507471	C	T
PI507473	C	T
PI507475	C	T
PI507479	C	T
PI507501	C	T
PI507539	C	T
PI507582	C	T
PI507584	C	T
PI507585	C	T
PI507588	C	T
PI507589	C	T
PI507590A	C	T
PI507590B	C	T
PI507601B	C	T
PI507602	C	T
PI507603	C	T
PI507604	C	T
PI507605	C	T
PI507606	C	T
PI507608	C	T
PI507609	C	T
PI507611	C	T
PI507613	C	T
PI507614B	C	T
PI507617	C	T
PI507618	C	T
PI507623	C	T
PI507624	C	T
PI507631	C	T
PI507633	C	T
PI507635	C	T
PI507643	C	T
PI507647	C	T
PI507650	C	T
PI507654	C	T
PI507655	C	T
PI507656	C	T
PI507657	C	T
PI507661	C	T
PI507666	C	T
PI507668	C	T
PI507671	C	T
PI507673	C	T
PI507676	C	T
PI507686C	C	T
PI507692A	C	T
PI507692B	C	T
PI507694	C	T
PI507701	C	T
PI507707	C	T
PI507708	C	T
PI507719	C	T
PI507720	C	T
PI507721	C	T
PI507723A	C	T
PI507725B	C	T
PI507727	C	T
PI507728	C	T
PI507730	C	T
PI507736	C	T
PI507738	C	T
PI507739B	C	T
PI507744	C	T
PI507746	C	T
PI507747	C	T
PI507748	C	T
PI507749	C	T
PI507760	C	T
PI507762	C	T
PI507764	C	T
PI507768	C	T
PI507769	C	T
PI507770	C	T
PI507771	C	T
PI507772	C	T
PI507775	C	T
PI507776	C	T
PI507777	C	T
PI507778	C	T
PI507779	C	T
PI507782	C	T
PI507792	C	T
PI507796	C	T
PI507809	C	T
PI507818B	C	T
PI507822	C	T
PI507839	C	T
PI507841B	C	T
PI507843	C	T
PI508060	C	T
PI508063	C	T
PI508064	C	T
PI508066	C	T
PI508067	C	T
PI508069	C	T
PI508083	C	T
PI508084	C	T
PI508269	C	T
PI509095	C	T
PI509100	C	T
PI509547	C	T
PI510675	C	T
PI511356	C	T
PI511357	C	T
PI511361	C	T
PI511813	C	T
PI512039	C	T
PI512322C	C	T
PI513382	C	T
PI518279	C	T
PI518280	C	T
PI518282	C	T
PI518284	C	T
PI518288	C	T
PI518665	C	T
PI518667	C	T
PI518668	C	T
PI518669	C	T
PI518670	C	T
PI518671	C	T
PI518672	C	T
PI518673	C	T
PI518676	C	T
PI518677	C	T
PI518750	C	T
PI518751	C	T
PI518752	C	T
PI518753	C	T
PI518754	C	T
PI522190	C	T
PI522193	C	T
PI522213B	C	T
PI522214B	C	T
PI522217	C	T
PI522226	C	T
PI522227	C	T
PI522229	C	T
PI522235C	C	T
PI525454	C	T
PI527704	C	T
PI531519	C	T
PI531520	C	T
PI532444B	C	T
PI532833	C	T
PI532834	C	T
PI533601	C	T
PI533605	C	T
PI533655	C	T
PI534646	C	T
PI534648	C	T
PI536009	C	T
PI536637	C	T
PI537094	C	T
PI537095	C	T
PI538375	C	T
PI538378	C	T
PI538401A	C	T
PI538401B	C	T
PI539861	C	T
PI539936	C	T
PI540452	C	T
PI540552	C	T
PI540553	C	T
PI540554	C	T
PI540556	C	T
PI542042	C	T
PI542044	C	T
PI542402	C	T
PI542403	C	T
PI542404	C	T
PI542709	C	T
PI542711	C	T
PI542712	C	T
PI542768	C	T
PI542972	C	T
PI543793	C	T
PI543794	C	T
PI543855	C	T
PI543856	C	T
PI543857	C	T
PI544354	C	T
PI546038	C	T
PI546039	C	T
PI546040	C	T
PI546041	C	T
PI546042	C	T
PI546043	C	T
PI546044	C	T
PI546045	C	T
PI54610	C	T
PI546375	C	T
PI546487	C	T
PI547094	C	T
PI547402	C	T
PI547403	C	T
PI547404	C	T
PI547405	C	T
PI547406	C	T
PI547407	C	T
PI547408	C	T
PI547409	C	T
PI547410	C	T
PI547411	C	T
PI547412	C	T
PI547413	C	T
PI547414	C	T
PI547415	C	T
PI547416	C	T
PI547417	C	T
PI547418	C	T
PI547419	C	T
PI547420	C	T
PI547421	C	T
PI547422	C	T
PI547423	C	T
PI547424	C	T
PI547425	C	T
PI547426	C	T
PI547427	C	T
PI547428	C	T
PI547429	C	T
PI547430	C	T
PI547431	C	T
PI547432	C	T
PI547433	C	T
PI547434	C	T
PI547435	C	T
PI547436	C	T
PI547437	C	T
PI547438	C	T
PI547439	C	T
PI547440	C	T
PI547441	C	T
PI547442	C	T
PI547443	C	T
PI547444	C	T
PI547445	C	T
PI547446	C	T
PI547447	C	T
PI547448	C	T
PI547449	C	T
PI547450	C	T
PI547451	C	T
PI547452	C	T
PI547453	C	T
PI547454	C	T
PI547455	C	T
PI547456	C	T
PI547457	C	T
PI547458	C	T
PI547459	C	T
PI547460	C	T
PI547461	C	T
PI547462	C	T
PI547463	C	T
PI547464	C	T
PI547465	C	T
PI547466	C	T
PI547467	C	T
PI547468	C	T
PI547469	C	T
PI547470	C	T
PI547471	C	T
PI547472	C	T
PI547473	C	T
PI547474	C	T
PI547475	C	T
PI547476	C	T
PI547477	C	T
PI547478	C	T
PI547479	C	T
PI547482	C	T
PI547484	C	T
PI547485	C	T
PI547486	C	T
PI547487	C	T
PI547488	C	T
PI547489	C	T
PI547490	C	T
PI547491	C	T
PI547492	C	T
PI547493	C	T
PI547494	C	T
PI547495	C	T
PI547496	C	T
PI547497	C	T
PI547498	C	T
PI547499	C	T
PI547500	C	T
PI547501	C	T
PI547502	C	T
PI547503	C	T
PI547505	C	T
PI547506	C	T
PI547507	C	T
PI547508	C	T
PI547509	C	T
PI547510	C	T
PI547511	C	T
PI547512	C	T
PI547513	C	T
PI547514	C	T
PI547515	C	T
PI547516	C	T
PI547517	C	T
PI547518	C	T
PI547519	C	T
PI547520	C	T
PI547521	C	T
PI547522	C	T
PI547524	C	T
PI547525	C	T
PI547526	C	T
PI547527	C	T
PI547530	C	T
PI547531	C	T
PI547532	C	T
PI547533	C	T
PI547535	C	T
PI547539	C	T
PI547540	C	T
PI547541	C	T
PI547542	C	T
PI547543	C	T
PI547544	C	T
PI547545	C	T
PI547546	C	T
PI547547	C	T
PI547549	C	T
PI547550	C	T
PI547551	C	T
PI547552	C	T
PI547553	C	T
PI547554	C	T
PI547555	C	T
PI547556	C	T
PI547557	C	T
PI547558	C	T
PI547559	C	T
PI547560	C	T
PI547561	C	T
PI547562	C	T
PI547563	C	T
PI547564	C	T
PI547565	C	T
PI547566	C	T
PI547567	C	T
PI547568	C	T
PI547569	C	T
PI547570	C	T
PI547571	C	T
PI547572	C	T
PI547573	C	T
PI547574	C	T
PI547576	C	T
PI547577	C	T
PI547578	C	T
PI547579	C	T
PI547580	C	T
PI547581	C	T
PI547585	C	T
PI547588	C	T
PI547589	C	T
PI547590	C	T
PI547591	C	T
PI547592	C	T
PI547593	C	T
PI547594	C	T
PI547595	C	T
PI547596	C	T
PI547597	C	T
PI547598	C	T
PI547599	C	T
PI547600	C	T
PI547601	C	T
PI547602	C	T
PI547603	C	T
PI547604	C	T
PI547605	C	T
PI547606	C	T
PI547607	C	T
PI547608	C	T
PI547609	C	T
PI547610	C	T
PI547611	C	T
PI547612	C	T
PI547613	C	T
PI547614	C	T
PI547615	C	T
PI547616	C	T
PI547617	C	T
PI547618	C	T
PI547619	C	T
PI547620	C	T
PI547621	C	T
PI547622	C	T
PI547623	C	T
PI547624	C	T
PI547625	C	T
PI547627	C	T
PI547628	C	T
PI547629	C	T
PI547630	C	T
PI547631	C	T
PI547632	C	T
PI547633	C	T
PI547635	C	T
PI547637	C	T
PI547639	C	T
PI547640	C	T
PI547641	C	T
PI547642	C	T
PI547644	C	T
PI547645	C	T
PI547647	C	T
PI547648	C	T
PI547649	C	T
PI547650	C	T
PI547651	C	T
PI547652	C	T
PI547654	C	T
PI547655	C	T
PI547656	C	T
PI547657	C	T
PI547659	C	T
PI547660	C	T
PI547661	C	T
PI547662	C	T
PI547663	C	T
PI547664	C	T
PI547665	C	T
PI547666	C	T
PI547668	C	T
PI547669	C	T
PI547670	C	T
PI547671	C	T
PI547672	C	T
PI547673	C	T
PI547674	C	T
PI547675	C	T
PI547676	C	T
PI547677	C	T
PI547678	C	T
PI547679	C	T
PI547680	C	T
PI547681	C	T
PI547682	C	T
PI547683	C	T
PI547684	C	T
PI547685	C	T
PI547686	C	T
PI547687	C	T
PI547688	C	T
PI547689	C	T
PI547690	C	T
PI547691	C	T
PI547692	C	T
PI547693	C	T
PI547694	C	T
PI547695	C	T
PI547696	C	T
PI547697	C	T
PI547698	C	T
PI547699	C	T
PI547700	C	T
PI547701	C	T
PI547702	C	T
PI547703	C	T
PI547704	C	T
PI547705	C	T
PI547706	C	T
PI547707	C	T
PI547708	C	T
PI547709	C	T
PI547710	C	T
PI547711	C	T
PI547712	C	T
PI547713	C	T
PI547714	C	T
PI547715	C	T
PI547716	C	T
PI547717	C	T
PI547718	C	T
PI547719	C	T
PI547720	C	T
PI547721	C	T
PI547722	C	T
PI547723	C	T
PI547724	C	T
PI547725	C	T
PI547726	C	T
PI547727	C	T
PI547728	C	T
PI547729	C	T
PI547730	C	T
PI547731	C	T
PI547732	C	T
PI547733	C	T
PI547734	C	T
PI547735	C	T
PI547736	C	T
PI547737	C	T
PI547738	C	T
PI547739	C	T
PI547740	C	T
PI547741	C	T
PI547742	C	T
PI547743	C	T
PI547744	C	T
PI547745	C	T
PI547746	C	T
PI547747	C	T
PI547748	C	T
PI547749	C	T
PI547750	C	T
PI547751	C	T
PI547752	C	T
PI547753	C	T
PI547754	C	T
PI547755	C	T
PI547756	C	T
PI547757	C	T
PI547758	C	T
PI547760	C	T
PI547761	C	T
PI547762	C	T
PI547763	C	T
PI547764	C	T
PI547765	C	T
PI547766	C	T
PI547767	C	T
PI547768	C	T
PI547769	C	T
PI547770	C	T
PI547771	C	T
PI547772	C	T
PI547773	C	T
PI547774	C	T
PI547775	C	T
PI547776	C	T
PI547777	C	T
PI547778	C	T
PI547779	C	T
PI547780	C	T
PI547781	C	T
PI547782	C	T
PI547783	C	T
PI547784	C	T
PI547785	C	T
PI547786	C	T
PI547787	C	T
PI547788	C	T
PI547789	C	T
PI547791	C	T
PI547792	C	T
PI547793	C	T
PI547794	C	T
PI547795	C	T
PI547796	C	T
PI547797	C	T
PI547799	C	T
PI547803	C	T
PI547805	C	T
PI547806	C	T
PI547807	C	T
PI547808	C	T
PI547816	C	T
PI547817	C	T
PI547820	C	T
PI547821	C	T
PI547823	C	T
PI547825	C	T
PI547826	C	T
PI547827	C	T
PI547828	C	T
PI547829	C	T
PI547832	C	T
PI547833	C	T
PI547834	C	T
PI547835	C	T
PI547836	C	T
PI547837	C	T
PI547838	C	T
PI547839	C	T
PI547840	C	T
PI547841	C	T
PI547842	C	T
PI547843	C	T
PI547845	C	T
PI547846	C	T
PI547847	C	T
PI547848	C	T
PI547849	C	T
PI547850	C	T
PI547852	C	T
PI547853	C	T
PI547854	C	T
PI547855	C	T
PI547856	C	T
PI547859	C	T
PI547860	C	T
PI547861	C	T
PI547868	C	T
PI547869	C	T
PI547870	C	T
PI547871	C	T
PI547872	C	T
PI547874	C	T
PI547875	C	T
PI547876	C	T
PI547877	C	T
PI547878	C	T
PI547879	C	T
PI547880	C	T
PI547881	C	T
PI547882	C	T
PI547883	C	T
PI547884	C	T
PI547887	C	T
PI547888	C	T
PI547890	C	T
PI547891	C	T
PI547892	C	T
PI547893	C	T
PI547894	C	T
PI547895	C	T
PI548159	C	T
PI548161	C	T
PI548171	C	T
PI548172	C	T
PI548174	C	T
PI548176	C	T
PI548180	C	T
PI548181	C	T
PI548191	C	T
PI548192	C	T
PI548193	C	T
PI548194	C	T
PI548198	C	T
PI548199	C	T
PI548202	C	T
PI548208	C	T
PI548209	C	T
PI548210	C	T
PI548211	C	T
PI548217	C	T
PI548218	C	T
PI548220	C	T
PI548222	C	T
PI548223	C	T
PI548224	C	T
PI548225	C	T
PI548226	C	T
PI548227	C	T
PI548228	C	T
PI548229	C	T
PI548230	C	T
PI548231	C	T
PI548233	C	T
PI548234	C	T
PI548235	C	T
PI548236	C	T
PI548239	C	T
PI548240	C	T
PI548242	C	T
PI548244	C	T
PI548245	C	T
PI548247	C	T
PI548248	C	T
PI548250	C	T
PI548251	C	T
PI548252	C	T
PI548253	C	T
PI548255	C	T
PI548257	C	T
PI548260	C	T
PI548261	C	T
PI548262	C	T
PI548263	C	T
PI548264	C	T
PI548265	C	T
PI548268	C	T
PI548271	C	T
PI548275	C	T
PI548279	C	T
PI548280	C	T
PI548281	C	T
PI548284	C	T
PI548285	C	T
PI548286	C	T
PI548287	C	T
PI548288	C	T
PI548289	C	T
PI548290	C	T
PI548292	C	T
PI548293	C	T
PI548295	C	T
PI548298	C	T
PI548311	C	T
PI548314	C	T
PI548345	C	T
PI548347	C	T
PI548348	C	T
PI548362	C	T
PI548364	C	T
PI548384	C	T
PI548402	C	T
PI548402S	C	T
PI548409	C	T
PI548421	C	T
PI548422	C	T
PI548422S	C	T
PI548423	C	T
PI548426	C	T
PI548448	C	T
PI548449	C	T
PI548452	C	T
PI548455	C	T
PI548461	C	T
PI548480	C	T
PI548481	C	T
PI548488	C	T
PI548490	C	T
PI548495	C	T
PI548499	C	T
PI548500	C	T
PI548501	C	T
PI548502	C	T
PI548503	C	T
PI548505	C	T
PI548506	C	T
PI548507	C	T
PI548508	C	T
PI548510	C	T
PI548511	C	T
PI548512	C	T
PI548513	C	T
PI548517	C	T
PI548518	C	T
PI548519	C	T
PI548520	C	T
PI548521	C	T
PI548522	C	T
PI548524	C	T
PI548525	C	T
PI548526	C	T
PI548527	C	T
PI548529	C	T
PI548530	C	T
PI548531	C	T
PI548532	C	T
PI548533	C	T
PI548534	C	T
PI548535	C	T
PI548536	C	T
PI548537	C	T
PI548538	C	T
PI548540	C	T
PI548541	C	T
PI548542	C	T
PI548545	C	T
PI548546	C	T
PI548547	C	T
PI548549	C	T
PI548551	C	T
PI548555	C	T
PI548556	C	T
PI548557	C	T
PI548558	C	T
PI548560	C	T
PI548561	C	T
PI548562	C	T
PI548563	C	T
PI548565	C	T
PI548569	C	T
PI548570	C	T
PI548571	C	T
PI548572	C	T
PI548573	C	T
PI548574	C	T
PI548575	C	T
PI548576	C	T
PI548580	C	T
PI548581	C	T
PI548582	C	T
PI548586	C	T
PI548589	C	T
PI548590	C	T
PI548591	C	T
PI548592	C	T
PI548593	C	T
PI548596	C	T
PI548597	C	T
PI548598	C	T
PI548602	C	T
PI548605	C	T
PI548606	C	T
PI548608	C	T
PI548609	C	T
PI548610	C	T
PI548611	C	T
PI548612	C	T
PI548613	C	T
PI548614	C	T
PI548615	C	T
PI548616	C	T
PI548617	C	T
PI548619	C	T
PI548620	C	T
PI548621	C	T
PI548622	C	T
PI548629	C	T
PI548630	C	T
PI548631	C	T
PI548632	C	T
PI548633	C	T
PI548634	C	T
PI548635	C	T
PI548636	C	T
PI548637	C	T
PI548640	C	T
PI548641	C	T
PI548642	C	T
PI548644	C	T
PI548645	C	T
PI548646	C	T
PI548647	C	T
PI548648	C	T
PI548650	C	T
PI548651	C	T
PI548655	C	T	Evaluation of Soybean Germplasm for Resistance to Multiple Nematode Species: Heterodera glycines, Meloidogyne incognita, and Rotylenchulus reniformis
PI548656	C	T
PI548657	C	T
PI548658	C	T
PI548659	C	T
PI548660	C	T
PI548661	C	T
PI548665	C	T
PI548668	C	T
PI548675	C	T
PI548677	C	T
PI548678	C	T
PI548681	C	T
PI548682	C	T
PI548683	C	T
PI548685	C	T
PI548691	C	T
PI548692	C	T
PI548693	C	T
PI548779	C	T
PI548969	C	T
PI548971	C	T
PI548974	C	T
PI548978	C	T
PI548982	C	T
PI548988	C	T
PI548991	C	T
PI549042B	C	T
PI552538	C	T
PI553041	C	T
PI553042	C	T
PI553044	C	T
PI553047	C	T
PI553048	C	T
PI553052	C	T
PI555396	C	T
PI555397	C	T
PI555398	C	T
PI555399	C	T
PI556572	C	T
PI556637	C	T
PI556687	C	T
PI556729	C	T
PI556738	C	T
PI556776	C	T
PI556778	C	T
PI556779	C	T
PI556783	C	T
PI556850	C	T
PI556859	C	T
PI556889	C	T
PI556931	C	T
PI556949	C	T
PI557010	C	T
PI557011	C	T
PI557535	C	T
PI559369	C	T
PI559370	C	T
PI559931	C	T
PI559932	C	T
PI560207	C	T
PI560909	C	T
PI560910	C	T
PI560911	C	T
PI561201	C	T
PI561218	C	T
PI561350B	C	T
PI561359	C	T
PI561371	C	T
PI561389B	C	T
PI561400	C	T
PI561401	C	T
PI561404	C	T
PI561405	C	T
PI561406	C	T
PI561407	C	T
PI561408	C	T
PI561572	C	T
PI561573	C	T
PI561698	C	T
PI561699	C	T
PI561701	C	T
PI561717	C	T
PI561858	C	T
PI562372	C	T
PI562373	C	T
PI562374	C	T
PI562535	C	T
PI562538	C	T
PI562539	C	T
PI562540	C	T
PI562541	C	T
PI562543	C	T
PI562544	C	T
PI562546	C	T
PI562548	C	T
PI562550	C	T
PI562551	C	T
PI562552	C	T
PI562557	C	T
PI562558	C	T
PI562563	C	T
PI564261	C	T
PI564276	C	T
PI564281	C	T
PI564849	C	T
PI567000A	C	T
PI567001B	C	T
PI567031B	C	T
PI567036	C	T
PI567045	C	T
PI567049A	C	T
PI567049B	C	T
PI567058B	C	T
PI567058C	C	T
PI567174C	C	T
PI567184	C	T
PI567194	C	T
PI567195	C	T
PI567201A	C	T
PI567201B	C	T
PI567201C	C	T
PI567201D	C	T
PI567205	C	T
PI567212C	C	T
PI567213A	C	T
PI567213C	C	T
PI567213D	C	T
PI567214A	C	T
PI567214B	C	T
PI567215B	C	T
PI567215C	C	T
PI567217A	C	T
PI567217B	C	T
PI567217C	C	T
PI567218	C	T
PI567225	C	T
PI567229B	C	T
PI567237	C	T
PI567238	C	T
PI567250B	C	T
PI567269A	C	T
PI567351B	C	T
PI567379B	C	T
PI567416	C	T
PI567418B	C	T
PI567418C	C	T
PI567458	C	T
PI567468	C	T
PI567471	C	T
PI567474	C	T
PI567482B	C	T
PI567489B	C	T
PI567490	C	T
PI567498	C	T
PI567502	C	T
PI567507A	C	T
PI567507C	C	T
PI567507E	C	T
PI567509	C	T
PI567519	C	T
PI567541A	C	T
PI567549B	C	T
PI567573B	C	T
PI567614C	C	T
PI567626	C	T
PI567636	C	T
PI567647B	C	T
PI567648C	C	T
PI567673B	C	T
PI567679B	C	T
PI567689	C	T
PI567693	C	T
PI567710	C	T
PI567726	C	T
PI567767B	C	T
PI567767D	C	T
PI567778	C	T
PI567782	C	T
PI567783	C	T
PI567789	C	T
PI567791	C	T
PI567902	C	T
PI568245	C	T
PI568254	C	T
PI572237	C	T
PI572238	C	T
PI572240	C	T
PI572242	C	T
PI572244	C	T
PI572245	C	T
PI572265C	C	T
PI572265D	C	T
PI573188	C	T
PI573285	C	T
PI573286	C	T
PI574486	C	T
PI574532	C	T
PI574533	C	T
PI574534	C	T
PI574541	C	T
PI576145	C	T
PI576146	C	T
PI576160	C	T
PI576166	C	T
PI577798	C	T
PI578002	C	T
PI578003	C	T
PI578057	C	T
PI578058	C	T
PI578246	C	T
PI578331	C	T
PI578332A	C	T
PI578332B	C	T
PI578333	C	T
PI578334	C	T
PI578336	C	T
PI578342B	C	T
PI578351	C	T
PI578352	C	T
PI578353A	C	T
PI578353B	C	T
PI578354	C	T
PI578355	C	T
PI578365	C	T
PI578438	C	T
PI578446B	C	T
PI578461	C	T
PI583295	C	T
PI583364	C	T
PI583365	C	T
PI583367	C	T
PI584441	C	T
PI584506	C	T
PI584527	C	T
PI586980	C	T
PI586981	C	T
PI587091	C	T
PI587555B	C	T
PI587556A	C	T
PI587559A	C	T
PI587563A	C	T
PI587563B	C	T
PI587566A	C	T
PI587574A	C	T
PI587575A	C	T
PI587588A	C	T
PI587597A	C	T
PI587600B	C	T
PI587638	C	T
PI587661B	C	T
PI587668C	C	T
PI587716B	C	T
PI587815C	C	T
PI587902A	C	T
PI587902B	C	T
PI587903A	C	T
PI587908	C	T
PI587911A	C	T
PI587911C	C	T
PI587912	C	T
PI587919	C	T
PI587921	C	T
PI587927	C	T
PI587931	C	T
PI587946A	C	T
PI587958	C	T
PI587959	C	T
PI587962	C	T
PI587968B	C	T
PI587969	C	T
PI587982A	C	T
PI587992A	C	T
PI587992C	C	T
PI587992D	C	T
PI587992E	C	T
PI587992F	C	T
PI587996C	C	T
PI587996D	C	T
PI588014D	C	T
PI588024B	C	T
PI588025	C	T
PI588026C	C	T
PI588028	C	T
PI588033A	C	T
PI588033B	C	T
PI588033C	C	T
PI588040	C	T
PI588047	C	T
PI590579	C	T
PI591429	C	T
PI591430	C	T
PI591431	C	T
PI591432	C	T
PI591433	C	T
PI591434	C	T
PI591435	C	T
PI591484	C	T
PI591485	C	T
PI591486	C	T
PI591487	C	T
PI591488	C	T
PI591490	C	T
PI591491	C	T
PI591492	C	T
PI591493	C	T
PI591494	C	T
PI591495	C	T
PI591496	C	T
PI591497	C	T
PI591498	C	T
PI591499	C	T
PI591503	C	T
PI591505	C	T
PI591507	C	T
PI591508	C	T
PI591509	C	T
PI591510	C	T
PI591511	C	T
PI591512	C	T
PI591515	C	T
PI591518	C	T
PI591519	C	T
PI591520	C	T
PI591521	C	T
PI591522	C	T
PI591523	C	T
PI591524	C	T
PI591525	C	T
PI591527	C	T
PI591528	C	T
PI591529	C	T
PI591530	C	T
PI591531	C	T
PI591535	C	T
PI591536	C	T
PI591537	C	T
PI591538	C	T
PI591539	C	T
PI591540	C	T
PI591541	C	T
PI591542	C	T
PI591543	C	T
PI591544	C	T
PI591545	C	T
PI591546	C	T
PI591547	C	T
PI591548	C	T
PI591561	C	T
PI591825	C	T
PI592389	C	T
PI592524	C	T
PI592560	C	T
PI592907A	C	T
PI592911A	C	T
PI592954	C	T
PI593238	C	T
PI593259	C	T
PI593647	C	T
PI593655	C	T
PI593951	C	T
PI593983	C	T
PI594142	C	T
PI594152	C	T
PI594172B	C	T
PI594305	C	T
PI594307	C	T
PI594408	C	T
PI594427C	C	T
PI594428	C	T
PI594440	C	T
PI594442A	C	T
PI594442B	C	T
PI594443	C	T
PI594448A	C	T
PI594448B	C	T
PI594451	C	T
PI594452	C	T
PI594459	C	T
PI594462	C	T
PI594463A	C	T
PI594463B	C	T
PI594476	C	T
PI594525	C	T
PI594527	C	T
PI594532	C	T
PI594542	C	T
PI594543	C	T
PI594546	C	T
PI594560A	C	T
PI594571	C	T
PI594591B	C	T
PI594598B	C	T
PI594599	C	T
PI594614B	C	T
PI594641	C	T
PI594670C	C	T
PI594670D	C	T
PI594675	C	T
PI594685A	C	T
PI594690A	C	T
PI594692	C	T
PI594693A	C	T
PI594700A	C	T
PI594700B	C	T
PI594702	C	T
PI594712	C	T
PI594726	C	T
PI594730A	C	T
PI594730B	C	T
PI594744	C	T
PI594759B	C	T
PI594759C	C	T
PI594763B	C	T
PI594799A	C	T
PI594801A	C	T
PI594801B	C	T
PI594802A	C	T
PI594819	C	T
PI594821A	C	T
PI594821B	C	T
PI594894	C	T
PI594895	C	T
PI594896	C	T
PI594897	C	T
PI594903	C	T
PI595081	C	T
PI595099	C	T
PI595363	C	T
PI595926	C	T
PI596526	C	T
PI596527	C	T
PI596540	C	T
PI596541	C	T
PI597383	C	T
PI597386	C	T
PI597388	C	T
PI597391C	C	T
PI597398	C	T
PI597400	C	T
PI597402	C	T
PI597405A	C	T
PI597405B	C	T
PI597405D	C	T
PI597406	C	T
PI597430B	C	T
PI597436	C	T
PI597440B	C	T
PI597445	C	T
PI597450A	C	T
PI597450B	C	T
PI597451A	C	T
PI597453	C	T
PI597454B	C	T
PI597456	C	T
PI597459B	C	T
PI597459C	C	T
PI597459D	C	T
PI597461A	C	T
PI597462B	C	T
PI597462C	C	T
PI597471B	C	T
PI597472	C	T
PI597478B	C	T
PI597649	C	T
PI597653	C	T
PI597654	C	T
PI597655	C	T
PI597656	C	T
PI597657	C	T
PI597658	C	T
PI597659	C	T
PI597660	C	T
PI597661	C	T
PI597662	C	T
PI597663	C	T
PI597664	C	T
PI598222	C	T
PI598358	C	T
PI599299	C	T
PI599300	C	T
PI599811	C	T
PI601982	C	T
PI601983	C	T
PI602059	C	T
PI602449	C	T
PI602450	C	T
PI602593	C	T
PI602594	C	T
PI602597	C	T
PI602896	C	T
PI602897	C	T
PI602950	C	T
PI60296-2	C	T
PI602996	C	T
PI603180	C	T
PI603181	C	T
PI603182	C	T
PI603183	C	T
PI603184	C	T
PI603185	C	T
PI603186	C	T
PI603187	C	T
PI603189	C	T
PI603191	C	T
PI603192	C	T
PI603194	C	T
PI603195	C	T
PI603196	C	T
PI603199	C	T
PI603200	C	T
PI603201	C	T
PI603202	C	T
PI603203	C	T
PI603205	C	T
PI603218	C	T
PI603308B	C	T
PI603423A	C	T
PI603425	C	T
PI603454	C	T
PI603466B	C	T
PI603502B	C	T
PI603502D	C	T
PI603509	C	T
PI603559	C	T
PI603571B	C	T
PI603580	C	T
PI603594	C	T
PI603623	C	T
PI603682	C	T
PI603698B	C	T
PI603698C	C	T
PI603698D	C	T
PI603698E	C	T
PI603698H	C	T
PI603698J	C	T
PI603708	C	T
PI603718A	C	T
PI603723	C	T
PI603738	C	T
PI603742C	C	T
PI603764C	C	T
PI603768	C	T
PI603769	C	T
PI603913B	C	T
PI603913C	C	T
PI603915D	C	T
PI603953	C	T
PI604100	C	T
PI605411	C	T
PI605758B	C	T
PI605772	C	T
PI605775	C	T
PI605777	C	T
PI605779D	C	T
PI605780B	C	T
PI605780C	C	T
PI605781B	C	T
PI605782	C	T
PI605782B	C	T
PI605786B	C	T
PI605788	C	T
PI605789A	C	T
PI605789B	C	T
PI605791B	C	T
PI605792B	C	T
PI605799A	C	T
PI605799B	C	T
PI605805A	C	T
PI605805B	C	T
PI605806A	C	T
PI605809A	C	T
PI605810A	C	T
PI605810B	C	T
PI605825C	C	T
PI605850A	C	T
PI605853A	C	T
PI605853B	C	T
PI605853C	C	T
PI605854A	C	T
PI605856	C	T
PI605858	C	T
PI605859A	C	T
PI605860	C	T
PI605863A	C	T
PI605865A	C	T
PI605867	C	T
PI605878	C	T
PI605879	C	T
PI606418A	C	T
PI606438B	C	T
PI606440B	C	T
PI606748	C	T
PI606749	C	T
PI607380	C	T
PI607385	C	T
PI607528	C	T
PI607835	C	T
PI608357	C	T
PI608726	C	T
PI610670	C	T
PI612344	C	T
PI612609	C	T
PI612740	C	T
PI612744	C	T
PI612745	C	T
PI612750	C	T
PI612762	C	T
PI612763	C	T
PI612764	C	T
PI613055	C	T
PI613056	C	T
PI614154	C	T
PI614673	C	T
PI614831	C	T
PI614833	C	T
PI615443	C	T
PI615444	C	T
PI615464	C	T
PI615470	C	T
PI615483	C	T
PI615485	C	T
PI615487	C	T
PI615495	C	T
PI615500	C	T
PI615505	C	T
PI615510B	C	T
PI615510C	C	T
PI615554	C	T
PI615585	C	T
PI615586	C	T
PI615695	C	T
PI616498	C	T
PI618613	C	T
PI618808	C	T
PI62199	C	T
PI628807	C	T
PI628808	C	T
PI628810	C	T
PI628812	C	T
PI628813	C	T
PI628820	C	T
PI628821	C	T
PI628822	C	T
PI628825	C	T
PI628827	C	T
PI628830	C	T
PI628836	C	T
PI628853	C	T
PI628857	C	T
PI628867	C	T
PI628877	C	T
PI628885	C	T
PI628888	C	T
PI628889	C	T
PI628903	C	T
PI628904	C	T
PI628906	C	T
PI628908	C	T
PI628909	C	T
PI628919	C	T
PI628928	C	T
PI628929	C	T
PI628931	C	T
PI628934	C	T
PI628941	C	T
PI628943	C	T
PI628948	C	T
PI628953	C	T
PI628959	C	T
PI628961	C	T
PI628963	C	T
PI628964	C	T
PI628965	C	T
PI628966	C	T
PI629004	C	T
PI629005	C	T
PI629015	C	T
PI631123	C	T
PI631157	C	T
PI631437	C	T
PI631438	C	T
PI632352	C	T
PI632401	C	T
PI632421	C	T
PI632422	C	T
PI632424	C	T
PI632426	C	T
PI632427	C	T
PI632428	C	T
PI632429	C	T
PI632430	C	T
PI632431	C	T
PI632650	C	T
PI632748	C	T
PI632935A	C	T
PI632942B	C	T
PI632946	C	T
PI632947	C	T
PI632948	C	T
PI632949	C	T
PI632961	C	T
PI632962	C	T
PI632963	C	T
PI633609	C	T
PI633620	C	T
PI633729	C	T
PI633732	C	T
PI633736	C	T
PI634193	C	T
PI634335	C	T
PI634365	C	T
PI634757	C	T
PI634759	C	T
PI634760	C	T
PI634761	C	T
PI634762	C	T
[truncated: 151 more rows]

## Sheet: Table - USDA collection 
Haplotype ID	Chromosome 13
	30804961	30805508
Hap1	C	T	2150
Hap2	T	G	17828
Total			19978
