# Supplementary material for: Genome-Wide Association Study for Resistance to the <em>Meloidogyne javanica</em> Causing Root-Knot Nematode in Soybean
Source: Preprints.org preprint supplement (doi:10.20944/preprints201912.0093.v1), 2019-12-07
Supplement: Supplementary file 2 [file Supplementary Table 2 - Distribution of the SNPs from GBS.xlsx]

## Sheet: Distribution - Chr
	Chromosome	Length	Variants	Average	Variants rate
	Chr 1	56831624	1774	2250	32035
	Chr 2	48577505	2122	2250	22892
	Chr 3	45779781	2192	2250	20884
	Chr 4	52389146	2758	2250	18995
	Chr 5	42234498	1572	2250	26866
	Chr 6	51416486	2488	2250	20665
	Chr 7	44630646	2019	2250	22105
	Chr 8	47837940	2203	2250	21714
	Chr 9	50189764	2238	2250	22426
	Chr 10	51566898	2370	2250	21758
	Chr 11	34766867	1382	2250	25156
	Chr 12	40091314	1255	2250	31945
	Chr 13	45874162	2573	2250	17829
	Chr 14	49042192	2067	2250	23726
	Chr 15	51756343	2882	2250	17958
	Chr 16	37887014	2428	2250	15604
	Chr 17	41641366	2428	2250	17150
	Chr 18	58018742	3830	2250	15148
	Chr 19	50746916	2612	2250	19428
	Chr 20	47904181	1799	2250	26628
	Total	949183385	44992	2250	21096

## Sheet: Distribution - Regions
Type (alphabetical order)	Count	Percent
INTERGENIC	23015	0.2172
DOWNSTREAM	22991	0.21698
INTRON	19636	0.18532
UPSTREAM	17909	0.16902
EXON	16607	0.15673
3'UTR	2721	0.02568
5'UTR	2391	0.02257
