# Supplementary material for: Genome-Wide Association Study for Resistance to the <em>Meloidogyne javanica</em> Causing Root-Knot Nematode in Soybean
Source: Preprints.org preprint supplement (doi:10.20944/preprints201912.0093.v1), 2019-12-07
Supplement: Supplementary file 4 [file Supplementary Table 4 - Validation of the SNPs in WGS data.xlsx]

## Sheet: Hap 80 - Raw Data
Plant name	S13_30804961	S13_30805508	M. javanica - reaction	Phenotyped obtained from Literature or/and our phenotype results
alleles	T/C	G/T
BR_16	T	G	3.8	our study; https://www.infoteca.cnptia.embrapa.br/infoteca/bitstream/doc/460383/1/doc123.pdf
BRS_232	T	G	S	https://ainfo.cnptia.embrapa.br/digital/bitstream/item/146447/1/catalogo-soja.pdf
BRS_284	C	T	R	https://www.embrapa.br/busca-de-solucoes-tecnologicas/-/produto-servico/389/soja---brs-284
BRS_360_RR	T	G	S	https://ainfo.cnptia.embrapa.br/digital/bitstream/item/146447/1/catalogo-soja.pdf
BRS_361	C	T	S	http://ainfo.cnptia.embrapa.br/digital/bitstream/item/62378/1/301-s99.pdf
BRS_Sambaiba	T	G	S	https://www.embrapa.br/documents/1355202/1529289/BRSSambaiba_convencional.pdf/051083bd-aca3-4140-a8a4-ebd294c25430
BRS_Valiosa_RR	C	T	R	https://www.embrapa.br/documents/1355202/1529289/CultivarBRSValiosaRR.pdf/b012ce9e-eb1b-468e-94c3-e0f4d22e3249
BRS/GO_8660	T	G	S	https://www.embrapa.br/documents/1355202/1529289/Nematoides+em+soja+-+identifica%C3%A7%C3%A3o+e+manejo+-+Waldir+Dias.pdf/91a56687-b9a8-752c-5805-706b99802126
BRSMG_850G_RR	C	T	R	http://www.sementesouroverde.com.br/views/soja_brsmg_850G.php
BRSMT_Pintado	T	G	4.8	our study
CD_201	C	T	R	http://www.cnpt.embrapa.br/biblio/p_do1212t1.htm
Embrapa_48	T	G	4.3	our study
FT_Cristalina	T	G	S	http://www.mineiraosementes.com.br/wp-content/uploads/2018/10/penetracao-e-desenvolvimento-meloidogyne.pdf
IAC_8	T	G	S	https://core.ac.uk/download/pdf/15437629.pdf
IAS_5	T	G	4.5	our study
Conquista	C	T	2.8	our study; http://nematologia.com.br/files/uploads/2011/11/tab-soja.pdf
NA_5909_RG	T	G	S	http://sementesmaua.com.br/soja/na-5909-rg/
Parana	T	G	S	our study
Santa_Rosa	C	T	3.5	our study
Anta_82	C	T	S	http://www.tmg.agr.br/ptbr/cultivar/anta-82
VMAX_RR	T	G	3.3	our study; http://www.fundacaoms.org.br/base/www/fundacaoms.org.br/media/attachments/210/210/newarchive-210.pdf
BRS/GO_8360	C	T	R	https://www.embrapa.br/busca-de-solucoes-tecnologicas/-/produto-servico/153/soja---brsgo-8360
BRSMT_Uirapuru	T	G	S	https://www.infoteca.cnptia.embrapa.br/infoteca/bitstream/doc/449821/1/Documentos153.pdf
Doko	T	G	S	https://books.google.com.br/books?id=BXsqAAAAYAAJ&pg=PA170&lpg=PA170&dq=Emgopa_301+soja+javanica&source=bl&ots=fw7zZFhFmP&sig=ACfU3U30YW7BFVXS5HwLHI3HgW9tshl7sg&hl=pt-BR&sa=X&ved=2ahUKEwjWrpzrmdHlAhXJDbkGHW00CP4Q6AEwDXoECAgQAQ#v=onepage&q=Emgopa_301%20soja%20javanica&f=false
Emgopa_301	C	T	S	https://books.google.com.br/books?id=BXsqAAAAYAAJ&pg=PA170&lpg=PA170&dq=Emgopa_301+soja+javanica&source=bl&ots=fw7zZFhFmP&sig=ACfU3U30YW7BFVXS5HwLHI3HgW9tshl7sg&hl=pt-BR&sa=X&ved=2ahUKEwjWrpzrmdHlAhXJDbkGHW00CP4Q6AEwDXoECAgQAQ#v=onepage&q=Emgopa_301%20soja%20javanica&f=false
BRS/GO_Chapadoes	T	G	3.2	our study;
Anta_82_RR	T	G	S	http://www.sementesprimeira.com.br/index.php?conteudo=biz__catalogo&canal_id=3&pro_id=15
BMX_Magna_RR	T	G	S	https://journals.flvc.org/nematropica/article/view/88208
BMX_Potencia_RR	T	G	S	https://journals.flvc.org/nematropica/article/view/88208
BMX_Turbo_RR	C	T	MR	https://www.embrapa.br/documents/1355202/1529289/Nematoides+em+soja+-+identifica%C3%A7%C3%A3o+e+manejo+-+Waldir+Dias.pdf/91a56687-b9a8-752c-5805-706b99802126
BRSGO_Ipameri	T	G	S	https://www.embrapa.br/documents/1355202/1529289/Nematoides+em+soja+-+identifica%C3%A7%C3%A3o+e+manejo+-+Waldir+Dias.pdf/91a56687-b9a8-752c-5805-706b99802126
BRSGO_Mineiros_RR	C	T	MR	https://www.embrapa.br/documents/1355202/1529289/Nematoides+em+soja+-+identifica%C3%A7%C3%A3o+e+manejo+-+Waldir+Dias.pdf/91a56687-b9a8-752c-5805-706b99802126
BRSMG_68_Vencedora	T	G	S	https://www.embrapa.br/documents/1355202/1529289/Nematoides+em+soja+-+identifica%C3%A7%C3%A3o+e+manejo+-+Waldir+Dias.pdf/91a56687-b9a8-752c-5805-706b99802126
BRSMG_752S	C	T	MR	https://www.embrapa.br/documents/1355202/1529289/Nematoides+em+soja+-+identifica%C3%A7%C3%A3o+e+manejo+-+Waldir+Dias.pdf/91a56687-b9a8-752c-5805-706b99802126
BRSMG_810C	T	G	MR	https://www.embrapa.br/documents/1355202/1529289/Nematoides+em+soja+-+identifica%C3%A7%C3%A3o+e+manejo+-+Waldir+Dias.pdf/91a56687-b9a8-752c-5805-706b99802126
BRS_133	T	G	4.5	our study;
BRS_239	C	T	R	https://www.embrapa.br/documents/1355202/1529289/Nematoides+em+soja+-+identifica%C3%A7%C3%A3o+e+manejo+-+Waldir+Dias.pdf/91a56687-b9a8-752c-5805-706b99802126
BRS_255_RR	T	G	S	http://nematologia.com.br/files/uploads/2011/11/tab-soja.pdf
BRS_283	C	T	MR	https://ainfo.cnptia.embrapa.br/digital/bitstream/item/146447/1/catalogo-soja.pdf
BRS_313	C	T	MR	https://www.embrapa.br/documents/1355202/1529289/Nematoides+em+soja+-+identifica%C3%A7%C3%A3o+e+manejo+-+Waldir+Dias.pdf/91a56687-b9a8-752c-5805-706b99802126
BRS_317	T	G	S	https://ainfo.cnptia.embrapa.br/digital/bitstream/item/146447/1/catalogo-soja.pdf
BRS_388_RR	T	G	S	https://ainfo.cnptia.embrapa.br/digital/bitstream/item/146447/1/catalogo-soja.pdf
BRS_7380_RR	C	T	R	https://www.embrapa.br/documents/1355202/1529289/Nematoides+em+soja+-+identifica%C3%A7%C3%A3o+e+manejo+-+Waldir+Dias.pdf/91a56687-b9a8-752c-5805-706b99802126
BRS_7980	C	T	R	https://ainfo.cnptia.embrapa.br/digital/bitstream/item/146447/1/catalogo-soja.pdf
BRS_8160_RR	C	T	MR	https://www.embrapa.br/documents/1355202/1529289/Nematoides+em+soja+-+identifica%C3%A7%C3%A3o+e+manejo+-+Waldir+Dias.pdf/91a56687-b9a8-752c-5805-706b99802126
BRS_Invernada	T	G	4.8	our study; http://nematologia.com.br/files/uploads/2011/11/tab-soja.pdf
BRS_Juliana_RR	C	T	MR	http://nematologia.com.br/files/uploads/2011/11/tab-soja.pdf
BRS_Macota	C	T	MR	https://www.esalq.usp.br/visaoagricola/sites/default/files/va05-fitossanidade07.pdf
BRS_Tracaja	T	G	S	http://nematologia.com.br/files/uploads/2011/11/tab-soja.pdf
BR_23	T	G
CD_202	T	G	4.5	our study; https://www.embrapa.br/documents/1355202/1529289/Nematoides+em+soja+-+identifica%C3%A7%C3%A3o+e+manejo+-+Waldir+Dias.pdf/91a56687-b9a8-752c-5805-706b99802126
CD_206	T	G	MR	https://www.embrapa.br/documents/1355202/1529289/Nematoides+em+soja+-+identifica%C3%A7%C3%A3o+e+manejo+-+Waldir+Dias.pdf/91a56687-b9a8-752c-5805-706b99802126
CD_215	T	G	S	http://www.coodetec.com.br/php/detalhes_cultivar.php?id=29
CD_219_RR	C	T	1.8; MR	our study; https://www.embrapa.br/documents/1355202/1529289/Nematoides+em+soja+-+identifica%C3%A7%C3%A3o+e+manejo+-+Waldir+Dias.pdf/91a56687-b9a8-752c-5805-706b99802126
Embrapa_4	T	G	3.4	our study
Emgopa_313	C	T	MR	https://www.embrapa.br/busca-de-solucoes-tecnologicas/-/produto-servico/189/soja---brs-313-tieta
FT_Cometa	C	T	R	https://books.google.com.br/books?id=BXsqAAAAYAAJ&pg=PA170&lpg=PA170&dq=Emgopa_301+soja+javanica&source=bl&ots=fw7zZFhFmP&sig=ACfU3U30YW7BFVXS5HwLHI3HgW9tshl7sg&hl=pt-BR&sa=X&ved=2ahUKEwjWrpzrmdHlAhXJDbkGHW00CP4Q6AEwDXoECAgQAQ#v=onepage&q=Emgopa_301%20soja%20javanica&f=false
IAC_100	T	G	4.7	our study
Ivai	T	G	4.0/ S	our study; https://books.google.com.br/books?id=BXsqAAAAYAAJ&pg=PA170&lpg=PA170&dq=Emgopa_301+soja+javanica&source=bl&ots=fw7zZFhFmP&sig=ACfU3U30YW7BFVXS5HwLHI3HgW9tshl7sg&hl=pt-BR&sa=X&ved=2ahUKEwjWrpzrmdHlAhXJDbkGHW00CP4Q6AEwDXoECAgQAQ#v=onepage&q=Emgopa_301%20soja%20javanica&f=false
MSoy_5826	C	T	4.7	our study;
MSoy_6101	T	G	S	https://www.agranda.com.br/produto/semente-de-soja-m-soy-6101-ctpa/
MSoy_8001	C	T	MR	https://www.agranda.com.br/produto/semente-de-soja-m-soy-8001-ctpa-monsoy/
MSoy_8866	T	G	S	http://jhsementes.com.br/novo/m-soy8866/
MSoy_9144_RR	T	G	S	https://www.agranda.com.br/produto/semente-de-soja-m-9144-rr-monsoy/
NA_7337_RR	C	T	R	http://www.niderasementes.com.br/produto/na-7337-rr.aspx
TMG_103_RR	C	T	MR	http://atividaderural.com.br/artigos/4fb3f19fd70f8.pdf
TMG_132_RR	T	G	S	http://www.tmg.agr.br/ptbr/cultivar/tmg-132-rr
TMG_4182	T	G	S	http://www.tmg.agr.br/ptbr/cultivar/tmg-4182
TMG_7262_RR	T	G	S	http://www.tmg.agr.br/ptbr/cultivar/tmg-7262-rr

## Sheet: Hap - Figure 1 
Plant name	Chr13:30804961	Chr13:30805508	M. javanica - Reaction
BRS 284	C	T	R
BRS Valiosa RR	C	T	R
BRSMG 850G RR	C	T	R
CD 201	C	T	R
BRS/GO 8360	C	T	R
BRS 239	C	T	R
BRS 7380 RR	C	T	R
BRS 7980	C	T	R
CD 219 RR	C	T	R
FT Cometa	C	T	R
NA 7337 RR	C	T	R
Conquista	C	T	MR
Santa Rosa	C	T	MR
BMX Turbo RR	C	T	MR
BRSGO Mineiros RR	C	T	MR
BRSMG 752S	C	T	MR
BRS 283	C	T	MR
BRS 313	C	T	MR
BRS 8160 RR	C	T	MR
BRS Juliana RR	C	T	MR
BRS Macota	C	T	MR
Emgopa 313	C	T	MR
MSoy 8001	C	T	MR
TMG 103 RR	C	T	MR
VMAX RR	T	G	MR
BRS/GO Chapadoes	T	G	MR
BRSMG 810C	T	G	MR
CD 206	T	G	MR
Embrapa 4	T	G	MR
BRS 361	C	T	S
Anta 82	C	T	S
Emgopa 301	C	T	S
MSoy 5826	C	T	S
BR 16	T	G	S
BRS 232	T	G	S
BRS 360 RR	T	G	S
BRS Sambaiba	T	G	S
BRS/GO 8660	T	G	S
BRSMT Pintado	T	G	S
Embrapa 48	T	G	S
FT Cristalina	T	G	S
IAC 8	T	G	S
IAS 5	T	G	S
NA 5909 RG	T	G	S
Parana	T	G	S
BRSMT Uirapuru	T	G	S
Doko	T	G	S
Anta 82 RR	T	G	S
BMX Magna RR	T	G	S
BMX Potencia RR	T	G	S
BRSGO Ipameri	T	G	S
BRSMG 68 Vencedora	T	G	S
BRS 133	T	G	S
BRS 255 RR	T	G	S
BRS 317	T	G	S
BRS 388 RR	T	G	S
BRS Invernada	T	G	S
BRS Tracaja	T	G	S
CD 202	T	G	S
CD 215	T	G	S
IAC 100	T	G	S
Ivai	T	G	S
MSoy 6101	T	G	S
MSoy 8866	T	G	S
MSoy 9144 RR	T	G	S
TMG 132 RR	T	G	S
TMG 4182	T	G	S
TMG 7262 RR	T	G	S
