# Supplementary material for: Genome-Wide Association Study for Resistance to the <em>Meloidogyne javanica</em> Causing Root-Knot Nematode in Soybean
Source: Preprints.org preprint supplement (doi:10.20944/preprints201912.0093.v1), 2019-12-07
Supplement: Supplementary file 5 [file Supplementary Table 5 - Expression Levels by RT-qPCR.xlsx]

## Sheet: Glyma.13g194600
Glyma.13g194600																									1dpi
																									2dpi
Eficiência Alvo:	0.81	1.8058																							6dpi
Eficiência End.:	0.9958
Tratament			Alvo	SD alvo	Media/Rep Biol.	Var alvo	Endogen	SD end.	Media/Rep Biol.	Var Endógeno	∆Ct	∆Ct SD	SD(Mock x Inoc)	∆∆Ct	RQ	RQ média	∆Ct mean G	∆∆Ct mean G	RQ mean G	tcalc	p>tcalc	Standart Error	>0.05% Aceita Ho
PI595099 1DPI	INOC	Rep. 1	25.9479	0.117266	26.0393	14.0446	27.0693	0.0577392	27.1264	16.0938	-1.0871	2.7335	1.40718	-2.47122	4.30811	1.8503	1.21544	-0.80913	1.61317	0.257149	0.80975	0.629308	Aceita H0: não há diferença entre os trat alfa=5%
			25.9984				27.1251
			26.1715				27.1847
		Rep. 2	24.4741	0.622943	25.1235		20.4793	0.59764	21.1692		3.95426			3.45716	0.129614
			25.1803				21.5005
			25.7161				21.5279
		Rep. 3	26.773	0.24016	27.0482		27.8168	0.214647	29.5937		-2.54547			-2.2382	3.75385
			27.1566				27.9095
			27.2151				27.5001
		Rep. 4	32.482	0.476439	32.982		29.7356	0.150487	29.9027		3.07925			3.30123	0.142127
			33.0331				30.0276
			33.4308				29.9448
		Rep. 5	33.2972	0.634729	32.6067		31.9526	0.222139	31.782		0.824681			0.145116	0.917811
			32.474				31.8625
			32.0487				31.5308
	MOC	Rep. 1	30.6999	0.352121	30.9738	3.70205	29.2625	0.397089	29.5896	2.81923	1.38412	0.696951					0.406307
			31.371				30.0315
			30.8504				29.4749
		Rep. 2	25.9464	0.72746	26.6708		26.0896	0.110989	26.1737		0.497101																		Glyma.13g194600	RQ Mean	RQ mean (log2)
			26.6647				26.132																					PI595099	1dpi	1.8503	0.88776
			27.4012				26.2995																					PI595099	2dpi	58.1296	5.8612
		Rep. 3	29.3304	0.32365	29.5348		29.9386	0.413265	29.842		-0.307275																	PI595099	6dpi	1.07522	0.104637
			29.9079				30.1985																					BRS133	1dpi	0.673826	-0.569553
			29.366				29.3891																					BRS133	2dpi	0.961305	-0.0569343
		Rep. 4	25.9957	0.377052	26.4306		26.6662	0.0283172	26.6526		-0.221973																	BRS133	6dpi	3.53122	1.82017
			26.63				26.6716
			26.6661				26.62
		Rep. 5	27.9895	0.410383	28.2167		27.3794	0.21308	27.5371		0.679565
			28.6904				27.7795
			27.9702				27.4525
PI595099 2DPI	INOC	Rep. 1	27.1369	0.239977	27.3414	3.76034	27.6141	0.118121	27.7054	6.2109	-0.36397	1.58898	4.19969	-9.517	277.157	58.1296	-0.026325	1.94662	0.316492	-0.20729	0.845909	1.87816	Aceita H0: não há diferença entre os trat alfa=5%
			27.2817				27.6633
			27.6056				27.8388
		Rep. 2	28.4137	0.42913	28.903		27.3826	0.0968112	27.2714		1.63158			2.42432	0.238645
			29.2154				27.2057
			29.08				27.226
		Rep. 3	28.1666	0.24314	28.4278		28.4567	0.0887881	30.755		-2.32719			-3.9082	10.072
			28.6475				28.386
			28.4693				28.5624
		Rep. 4	32.3317	0.314135	32.0201		32.2832	0.726529	31.666		0.354048			0.482644	0.75183
			32.0251				31.8495
			31.7035				30.8654
		Rep. 5	31.2195	0.27704	31.0942		32.6803	0.139381	32.8069		-1.71269			-1.50144	2.4287
			30.7766				32.9563
			31.2865				32.7841
	MOC	Rep. 1	29.7601	0.409672	30.1752	7.0786	20.8902	0.119363	21.0221	21.3971	9.15303	4.13913					1.92029
			30.5792				21.0536
			30.1862				21.1226
		Rep. 2	31.5769	0.572875	32.2192		32.9768	0.0325824	33.012		-0.792732
			32.6773				33.041
			32.4035				33.0181
		Rep. 3	24.8977	0.253296	25.1835		23.9329	0.305825	23.6025		1.58101
			25.3802				23.3294
			25.2726				23.5452
		Rep. 4	27.9291	0.594076	28.1872		28.1516	0.308275	28.3158		-0.128596
			28.8666				28.6714
			27.7658				28.1244
		Rep. 5	27.7281	0.164935	27.6386		27.87	0.0258113	27.8499		-0.211252
			27.4483				27.8208
			27.7396				27.8589
PI595099 6DPI	INOC	Rep. 1	31.1621	0.712685	31.7379	4.66052	30.0947	0.807139	31.0169	4.3016	0.720969	0.761739	1.01152	-0.347048	1.22766	1.07522	0.287871	-0.0354788	1.02119	0.0175374	0.987109	0.505759	Aceita H0: não há diferença entre os trat alfa=5%
			31.5166				31.3617
			32.535				31.5944
		Rep. 2	28.3904	0.101364	28.4986		29.4593	0.11915	29.3284		-0.829774			-0.310002	1.20107
			28.5913				29.2263
			28.5142				29.2995
		Rep. 3
		Rep. 4	27.0535	0.558859	27.5703		26.6443	0.13476	26.7534		0.816868			1.41443	0.433471
			28.1634				26.9041
			27.494				26.7119
		Rep. 5	30.7441	0.989987	31.693		31.0182	0.377736	31.2496		0.443422			-0.615461	1.4387
			32.7195				31.6855
			31.6154				31.0451
	MOC	Rep. 1	26.2755	0.264968	26.5788	1.35862	25.2213	0.251298	25.5108	2.2499	1.06802	0.937074					0.252393
			26.7653				25.673
			26.6957				25.638
		Rep. 2	28.2126	0.302509	28.5554		28.8131	0.247259	29.0752		-0.519772
			28.785				29.3043
			28.6685				29.1081
		Rep. 3
		Rep. 4	27.0196	0.246778	27.1798		27.6849	0.159832	27.7774		-0.597558
			27.0559				27.9619
			27.464				27.6853
		Rep. 5	29.0119	0.158422	29.0801		27.8594	0.154844	28.0213		1.05888
			29.2612				28.1679
			28.9673				28.0365
BRS133 -1DPI	INOC	Rep. 1	28.8349	0.0731845	28.8722	0.514495	26.5545	0.207474	26.7891	3.52572	2.08312	1.0861	0.840209	0.744261	0.644126	0.673826	2.3119	-0.567986	1.39889	0.338003	0.757632	0.420104	Aceita H0: não há diferença entre os trat alfa=5%
			28.8253				26.8644
			28.9566				26.9484
		Rep. 2
		Rep. 3	28.7523	0.101252	28.864		27.4753	0.291788	26.4835		2.38048			0.209064	0.883771
			28.9499				27.226
			28.8898				26.8937
		Rep. 4	29.0144	0.154839	29.1931		27.5795	0.117161	27.7139		1.47922			0.412143	0.783818
			29.2797				27.768
			29.2853				27.7943
		Rep. 5	27.8752	1.61417	27.575		23.0694	0.496632	23.5554		4.01957			1.62129	0.383588
			29.018				24.062
			25.8318				23.535
	MOC	Rep. 1	28.6271	0.236126	28.7588	23.2032	27.0767	0.306351	27.4199	168.054	1.33886	0.641131					1.74391
			29.0314				27.5174
			28.6178				27.6657
		Rep. 2
		Rep. 3	28.0163	0.227871	28.1134		26.4671	0.466711	25.942		2.17142
			28.3738				25.7844
			27.9503				25.5745
		Rep. 4	35.2875	0.714114	35.0125		35.0494	1.01776	33.9455		1.06708
			34.2018				33.0445
			35.5483				33.7424
		Rep. 5	22.8533	0.425928	23.2736		20.4205	0.40161	20.8753		2.39829
			23.7049				21.024
			23.2625				21.1813
BRS133 2DPI	INOC	Rep. 1	28.2992	0.431268	27.8026	5.19964	26.478	0.0875519	26.4285	8.65744	1.37411	1.12633	0.858139	-0.906594	1.70882	0.961305	2.12729	-0.746208	1.55428	0.434783	0.693097	0.42907	Aceita H0: não há diferença entre os trat alfa=5%
			27.5218				26.48
			27.5868				26.3274
		Rep. 2	28.0206	0.172951	27.9175		24.4482	0.233548	24.3912		3.52637			2.5256	0.224778
			27.7179				24.5909
			28.0141				24.1344
		Rep. 3	31.9235	0.684919	31.1934		28.0854	0.456873	29.6518		1.54156			0.710772	0.657002
			30.565				28.8714
			31.0916				28.882
		Rep. 4
		Rep. 5	31.8593	0.4714	32.2747		31.4735	0.270788	31.2464		1.02825			-0.383814	1.25462
			32.787				30.9467
			32.1777				31.3192
	MOC	Rep. 1	30.1188	0.0852182	30.132	0.120706	27.8956	0.145999	27.8513	0.211235	2.2807	0.647493					1.38108
			30.0541				27.97
			30.223				27.6883
		Rep. 2	29.7684	0.0480163	29.8079		28.6773	0.121648	28.8071		1.00077
			29.8613				28.9184
			29.7939				28.8257
		Rep. 3	29.4629	0.0524584	29.4192		28.3469	0.210023	28.5884		0.830786
			29.361				28.6905
			29.4337				28.7278
		Rep. 4
		Rep. 5	29.5403	0.114795	29.408		27.8316	0.149421	27.9959		1.41206
			29.3344				28.1236
			29.3493				28.0325
BRS133 6 DPI	INOC	Rep. 1				1.70993				1.29849		0.85855	1.17722			3.53122	1.79523	1.28498	0.467934	-0.545769	0.62319	0.58861	Aceita H0: não há diferença entre os trat alfa=5%
		Rep. 2	33.6365	0.441778	33.2274		30.7701	0.10581	30.8195		2.40786			-0.764965	1.5716
			33.2867				30.941
			32.759				30.7475
		Rep. 3	31.2802	0.60339	30.5837		29.613	0.18044	30.0188		0.564919			-3.80967	9.50223
			30.2517				29.9702
			30.2192				29.7469
		Rep. 4	32.7732	0.420803	32.8246		31.1732	0.365878	31.2066		1.61801			-1.46113	2.37152
			32.4319				31.588
			33.2688				30.8586
		Rep. 5	30.8541	0.17204	31.0163		27.9989	0.612788	28.6683		2.34803			0.653727	0.679529
			31.1967				29.2016
			30.9981				28.8043
	MOC	Rep. 1				11.477				18.2117		1.09616					3.08021
		Rep. 2	23.6562	0.78662	24.5225		20.8209	0.46487	21.3497		3.17282
			24.7191				21.694
			25.1922				21.5342
		Rep. 3	24.7488	1.01305	24.6019		20.2925	0.369279	20.2274		4.37458
			25.5335				20.5597
			23.5235				19.8298
		Rep. 4	22.2513	0.669468	22.8767		19.8213	0.0966409	19.7976		3.07914
			23.5829				19.6913
			22.7959				19.8802
		Rep. 5	30.5051	0.236639	30.5866		28.7646	0.111369	28.8923		1.69431
			30.4015				28.9429
			30.8532				28.9694

## Sheet: Glyma.13g194700
Glyma.13g194700																								1dpi
																								2dpi
Eficiência Alvo:	0.9988	1.9946																						6dpi
Eficiência End.:	0.9958
Tratamento			Alvo	SD alvo	Media/Rep Biol.	Var alvo	Endógeno	SD end.	Media/Rep Biol.	Var Endógeno	∆Ct	∆Ct SD	SD(Mock x Inoc)	∆∆Ct	RQ	RQ média	∆Ct mean G	∆∆Ct mean G	RQ mean G	tcalc	p>tcalc	Standart Error	>0.05% Aceita Ho
PI595099 1DPI	INOC	Rep. 1	23.9426	0.141955	24.0711	8.95594	27.0693	0.0577392	27.1264	16.0938	-3.05523	5.78229	2.88265	0.846584	0.557374	0.972099	0.119195	-2.55943	5.85408	0.397068	0.711592	1.28916	Aceita H0: não há diferença entre os trat alfa=5%
			24.0473				27.1251
			24.2235				27.1847
		Rep. 2	30.4857	0.534809	31.0896		20.4793	0.59764	21.1692		9.92034			11.2213	0.000431748
			31.2797				21.5005
			31.5034				21.5279
		Rep. 3	24.4824	0.625951	25.1898		27.8168	0.214647	29.5937		-4.40395			-0.949582	1.92636
			25.6721				27.9095
			25.4147				27.5001
		Rep. 4	27.7017	0.606415	28.0968		29.7356	0.150487	29.9027		-1.80588			-0.787229	1.72209
			27.7937				30.0276
			28.795				29.9448
		Rep. 5	29.2392	1.11421	29.8711		31.9526	0.222139	31.782		-1.91086			0.614501	0.654242
			31.1576				31.8625
			29.2165				31.5308
	MOC	Rep. 1	26.1191	0.374683	25.6878	0.367813	29.2625	0.397089	29.5896	2.81923	-3.90182	1.27385					-2.44023
			25.5025				30.0315
			25.4419				29.4749
		Rep. 2	24.588	0.313741	24.8727		26.0896	0.110989	26.1737		-1.30095
			25.2091				26.132
			24.821				26.2995
		Rep. 3	26.4473	0.079638	26.3877		29.9386	0.413265	29.842		-3.45437																	Glyma.13g194700	RQ Mean	RQ mean (log2)
			26.4184				30.1985																				PI595099	1dpi	0.972099	-0.0408247
			26.2972				29.3891																				PI595099	2dpi	7.20363	2.84872
		Rep. 4	24.4652	1.04298	25.6339		26.6662	0.0283172	26.6526		-1.01865																PI595099	6dpi	2.13858	1.09665
			26.47				26.6716																				BRS133	1dpi	0.547611	-0.868778
			25.9666				26.62																				BRS133	2dpi	3.00676	1.58821
		Rep. 5	24.9167	0.138785	25.0118		27.3794	0.21308	27.5371		-2.52536																BRS133	6dpi	10181.1	13.3136
			24.9476				27.7795
			25.171				27.4525
PI595099 2DPI	INOC	Rep. 1				2.4603				6.81129		2.46246	1.63228			7.20363	-3.4904	0.488332	0.71379	-0.149586	0.890582	0.816141	Aceita H0: não há diferença entre os trat alfa=5%
		Rep. 2	25.5121	0.395469	25.9419		27.3826	0.0968112	27.2714		-1.32957			2.85904	0.1389
			26.0231				27.2057
			26.2904				27.226
		Rep. 3	25.3279	0.185977	25.4143		28.4567	0.0887881	30.755		-5.3407			-3.72416	13.0831
			25.2872				28.386
			25.6277				28.5624
		Rep. 4	28.7866	0.0898127	28.8812		32.2832	0.726529	31.666		-2.78486			0.537966	0.689744
			28.8916				31.8495
			28.9653				30.8654
		Rep. 5	25.6237	0.383666	26.0138		32.6803	0.139381	32.8069		-6.79308			-3.91277	14.9028
			26.3907				32.9563
			26.027				32.7841
	MOC	Rep. 1				7.85151				14.8093		1.07164					-3.00207
		Rep. 2	28.1888	0.591626	28.8234		32.9768	0.0325824	33.012		-4.18861
			28.9215				33.041
			29.3598				33.0181
		Rep. 3	21.8995	0.120962	21.986		23.9329	0.305825	23.6025		-1.61655
			21.9342				23.3294
			22.1242				23.5452
		Rep. 4	24.7143	0.401486	24.993		28.1516	0.308275	28.3158		-3.32283
			25.4532				28.6714
			24.8114				28.1244
		Rep. 5	24.8521	0.183102	24.9696		27.87	0.0258113	27.8499		-2.88031
			24.8761				27.8208
			25.1806				27.8589
PI595099 6DPI	INOC	Rep. 1	26.4484	0.0857943	26.5165	0.918947	30.0947	0.807139	31.0169	4.3016	-4.50046	1.18434	0.994305	-1.67615	3.18128	2.13858	-3.97783	0.46569	0.725037	-0.234179	0.829918	0.497153	Aceita H0: não há diferença entre os trat alfa=5%
			26.4882				31.3617
			26.6128				31.5944
		Rep. 2	25.2954	0.273284	25.1487		29.4593	0.11915	29.3284		-4.17967			0.279176	0.824684
			25.3173				29.2263
			24.8334				29.2995
		Rep. 3
		Rep. 4	24.6911	0.196538	24.4854		26.6443	0.13476	26.7534		-2.26807			1.62014	0.326733
			24.4655				26.9041
			24.2995				26.7119
		Rep. 5	25.9171	0.356382	26.2864		31.0182	0.377736	31.2496		-4.96313			-2.08593	4.2216
			26.6282				31.6855
			26.314				31.0451
	MOC	Rep. 1	22.3346	0.30504	22.6865	1.13269	25.2213	0.251298	25.5108	2.2499	-2.82431	0.798735					-3.51214
			22.8495				25.673
			22.8754				25.638
		Rep. 2	24.4877	0.132499	24.6163		28.8131	0.247259	29.0752		-4.45885
			24.6088				29.3043
			24.7524				29.1081
		Rep. 3
		Rep. 4	23.688	0.175241	23.8892		27.6849	0.159832	27.7774		-3.88821
			24.0083				27.9619
			23.9712				27.6853
		Rep. 5	24.8876	0.255186	25.1441		27.8594	0.154844	28.0213		-2.8772
			25.1466				28.1679
			25.398				28.0365
BRS133 -1DPI	INOC	Rep. 1	26.5436	0.158099	26.3771	0.161734	26.5545	0.207474	26.7891	0.418686	-0.412005	0.626986	1.22388	0.94346	0.521312	0.547611	-0.700032	-1.09124	2.1243	0.445813	0.685943	0.61194	Aceita H0: não há diferença entre os trat alfa=5%
			26.3587				26.8644
			26.229				26.9484
		Rep. 2	26.9475	0.166386	26.7655		28.1558	0.120953	28.2836		-1.51805			0.593204	0.663933
			26.7279				28.2985
			26.6211				28.3964
		Rep. 3	27.5169	0.156737	27.3432		27.4753	0.291788	27.4561		-0.112945			0.339857	0.790846
			27.2124				27.226
			27.3002				26.8937
		Rep. 4	26.2819	0.523054	26.699		27.5795	0.117161	27.7139		-1.01492			2.23065	0.214351
			27.2858				27.768
			26.5293				27.7943
		Rep. 5
	MOC	Rep. 1	26.3667	0.280502	26.0645	6.58042	27.0767	0.306351	27.4199	13.7317	-1.35547	1.18305					-1.79128
			26.0144				27.5174
			25.8124				27.6657
		Rep. 2	29.7813	0.255744	29.5527		31.5458	0.104285	31.664		-2.11126
			29.6004				31.7029
			29.2765				31.7432
		Rep. 3	25.3132	0.185936	25.4892		26.4671	0.466711	25.942		-0.452802
			25.4708				25.7844
			25.6837				25.5745
		Rep. 4	30.8835	0.685625	30.6999		35.0494	1.01776	33.9455		-3.24558
			29.9412				33.0445
			31.275				33.7424
		Rep. 5
BRS133 2DPI	INOC	Rep. 1	24.821	0.0501325	24.7859	2.96631	26.478	0.0875519	26.4285	5.82002	-1.64253	0.933699	0.924025	-1.25576	2.37984	3.00676	-2.35075	1.22238	0.429993	-0.76377	0.524805	0.533486	Aceita H0: não há diferença entre os trat alfa=5%
			24.8083				26.48
			24.7285				26.3274
		Rep. 2
		Rep. 3	26.0254	0.180017	26.2331		28.0854	0.456873	29.6518		-3.41872			-1.5313	2.87851
			26.3451				28.8714
			26.3287				28.882
		Rep. 4
		Rep. 5	28.9042	0.602417	28.2166		31.4735	0.270788	31.2464		-3.02985			-1.91896	3.76193
			27.9641				30.9467
			27.7815				31.3192
	MOC	Rep. 1	27.3589	0.20366	27.4645	0.158783	27.8956	0.145999	27.8513	0.152554	-0.386765	0.750483					-1.12836
			27.3354				27.97
			27.6993				27.6883
		Rep. 2
		Rep. 3	26.2673	0.411179	26.701		28.3469	0.210023	28.5884		-1.88743
			26.7504				28.6905
			27.0852				28.7278
		Rep. 4
		Rep. 5	26.9363	0.0619682	26.885		27.8316	0.149421	27.9959		-1.1109
			26.8161				28.1236
			26.9026				28.0325
BRS133 6 DPI	INOC	Rep. 1	32.5467	0.469352	33.0843	7.55103	22.8021	0.591531	23.0862	10.8624	9.99811	5.74465	6.38467	0.646652	0.639879	10181.1	-0.183472	7.90018	0.00427647	-0.553368	0.609484	2.85531	Aceita H0: não há diferença entre os trat alfa=5%
			33.4127				23.7662
			33.2935				22.6904
		Rep. 2	27.3976	0.234628	27.6608		30.7701	0.10581	30.8195		-3.1587			-12.6764	6325.61
			27.7371				30.941
			27.8478				30.7475
		Rep. 3	26.3012	0.206815	26.5336		29.613	0.18044	30.0188		-3.48518			-15.2662	37814.3
			26.6023				29.9702
			26.6973				29.7469
		Rep. 4	29.409	0.437927	28.9608		31.1732	0.365878	31.2066		-2.24575			-12.7735	6763.9
			28.9397				31.588
			28.5339				30.8586
		Rep. 5	25.9795	0.394222	26.4003		27.9989	0.612788	28.6683		-2.26794			0.326442	0.798205
			26.4603				29.2016
			26.7611				28.8043
	MOC	Rep. 1	31.1633	0.503485	31.6321	5.25122	22.2561	0.0544113	22.2806	13.6752	9.35146	5.84498					7.71671
			32.1642				22.343
			31.5687				22.2428
		Rep. 2	30.6093	0.224727	30.8674		20.8209	0.46487	21.3497		9.51773
			30.9737				21.694
			31.0193				21.5342
		Rep. 3	31.6954	0.34041	32.0084		20.2925	0.369279	20.2274		11.781
			32.3708				20.5597
			31.9588				19.8298
		Rep. 4	29.7333	0.715675	30.3253		19.8213	0.0966409	19.7976		10.5277
			31.1206				19.6913
			30.1219				19.8802
		Rep. 5	25.7918	0.438343	26.2979		28.7646	0.111369	28.8923		-2.59438
			26.5532				28.9429
			26.5489				28.9694

## Sheet: Glyma.13g194800
Glyma.13g194800																								1dpi
																								2dpi
Eficiência Alvo:	0.9278	1.9236																						6dpi
Eficiência End.:	0.9958
Tratamento			Alvo	SD alvo	Media/Rep Biol.	Var alvo	Endógeno	SD end.	Media/Rep Biol.	Var Endógeno	∆Ct	∆Ct SD	SD(Mock x Inoc)	∆∆Ct	RQ	RQ média	∆Ct mean G	∆∆Ct mean G	RQ mean G	tcalc	p>tcalc	Standart Error	>0.05% Aceita Ho
PI595099 1DPI	INOC	Rep. 1	29.154	0.639673	29.8926	12.0482	27.0693	0.0577392	27.1264	4.52346	2.76618	2.39579	1.75986	1.37354	0.407153	0.59331	3.87643	-1.78441	3.21349	0.506975	0.647089	0.879929	Aceita H0: não há diferença entre os trat alfa=5%
			30.2716				27.1251
			30.2521				27.1847
		Rep. 2
		Rep. 3	29.4971	0.579457	30.1303		27.8168	0.214647	29.5937		0.536572			-0.195313	1.1363
			30.6341				27.9095
			30.2596				27.5001
		Rep. 4	35.5407	0.745033	36.1538		29.7356	0.150487	29.9027		6.25111			3.64241	0.0922865
			36.983				30.0276
			35.9377				29.9448
		Rep. 5	34.9843	0.804751	35.8823		31.9526	0.222139	31.782		4.1003			0.465431	0.737504
			36.5382				31.8625
			36.1243				31.5308
	MOC	Rep. 1	30.6824	0.385248	30.9823	0.741347	29.2625	0.397089	29.5896	2.43087	1.39264	1.28924					2.09202
			30.8476				30.0315
			31.4168				29.4749
		Rep. 2																											Glyma.13g194800	RQ Mean	RQ mean (log2)
																												PI595099	1dpi	0.59331	-0.753143
																												PI595099	2dpi	4.64083	2.21438
		Rep. 3	30.5348	0.220308	30.5739		29.9386	0.413265	29.842		0.731885																	PI595099	6dpi	1.53864	0.621655
			30.3758				30.1985																					BRS133	1dpi	0.344997	-1.53535
			30.8112				29.3891																					BRS133	2dpi	0.92405	-0.113957
		Rep. 4	28.9822	0.247198	29.2613		26.6662	0.0283172	26.6526		2.6087																	BRS133	6dpi	214409	17.71
			29.4527				26.6716
			29.349				26.62
		Rep. 5	31.0404	0.181905	31.172		27.3794	0.21308	27.5371		3.63487
			31.3796				27.7795
			31.096				27.4525
PI595099 2DPI	INOC	Rep. 1				1.99412				5.05818		1.40293	0.827114			4.64083	1.93344	1.25393	0.44029	-0.875282	0.473725	0.477535	Aceita H0: não há diferença entre os trat alfa=5%
		Rep. 2
		Rep. 3	31.819	0.217493	31.5685		28.4567	0.0887881	30.755		0.813521			-2.54031	5.26913
			31.4277				28.386
			31.4588				28.5624
		Rep. 4	35.5533	1.01506	34.3844		32.2832	0.726529	31.666		2.7184			-0.471023	1.36089
			33.8752				31.8495
			33.7248				30.8654
		Rep. 5	32.2155	1.43239	32.7887		32.6803	0.139381	32.8069		-0.0181866			-3.03706	7.29247
			31.7317				32.9563
			34.4189				32.7841
	MOC	Rep. 1				6.06738				6.74536		0.167485					3.18738
		Rep. 2
		Rep. 3	26.3682	0.531603	26.9563		23.9329	0.305825	23.6025		3.35383
			27.4026				23.3294
			27.0983				23.5452
		Rep. 4	31.0601	0.848174	31.5052		28.1516	0.308275	28.3158		3.18942
			32.4833				28.6714
			30.9723				28.1244
		Rep. 5	30.6865	0.596748	30.8688		27.87	0.0258113	27.8499		3.01888
			30.3844				27.8208
			31.5354				27.8589
PI595099 6DPI	INOC	Rep. 1	32.6925	0.690355	33.4788	2.69134	30.0947	0.807139	31.0169	4.3016	2.46193	0.730844	0.984611	-0.760895	1.64506	1.53864	2.13533	0.223665	0.86388	-0.11358	0.916745	0.492305	Aceita H0: não há diferença entre os trat alfa=5%
			33.9852				31.3617
			33.7588				31.5944
		Rep. 2	31.1937	0.413886	31.1831		29.4593	0.11915	29.3284		1.85473			0.171359	0.893953
			31.5916				29.2263
			30.764				29.2995
		Rep. 3
		Rep. 4	29.504	0.183915	29.7072		26.6443	0.13476	26.7534		2.95375			1.49116	0.376999
			29.8623				26.9041
			29.7552				26.7119
		Rep. 5	31.8225	0.702349	32.5205		31.0182	0.377736	31.2496		1.27093			-1.79628	3.23855
			32.5118				31.6855
			33.2271				31.0451
	MOC	Rep. 1	28.6913	0.0772484	28.7336	1.31115	25.2213	0.251298	25.5108	2.2499	3.22282	0.914289					2.359
			28.8228				25.673
			28.6868				25.638
		Rep. 2	30.6778	0.0766716	30.7585		28.8131	0.247259	29.0752		1.68337
			30.8303				29.3043
			30.7675				29.1081
		Rep. 3
		Rep. 4	29.1542	0.0981777	29.24		27.6849	0.159832	27.7774		1.46259
			29.2187				27.9619
			29.347				27.6853
		Rep. 5	30.942	0.183736	31.0885		27.8594	0.154844	28.0213		3.06721
			31.2946				28.1679
			31.0289				28.0365
BRS133 -1DPI	INOC	Rep. 1	29.4756	0.191098	29.4106	0.759794	26.5545	0.207474	26.7891	0.214756	2.62143	0.915249	2.0351	1.34889	0.413772	0.344997	2.61874	-2.68451	5.7904	0.761584	0.525859	1.17497	Aceita H0: não há diferença entre os trat alfa=5%
			29.5606				26.8644
			29.1954				26.9484
		Rep. 2
		Rep. 3	31.8358	0.953927	30.8566		27.4753	0.291788	27.4561		3.40052			1.09855	0.4874
			30.8039				27.226
			29.9302				26.8937
		Rep. 4	29.4481	0.859553	29.2904		27.5795	0.117161	27.7139		1.57647			3.0744	0.133819
			30.0601				27.768
			28.3629				27.7943
		Rep. 5
	MOC	Rep. 1	28.2835	0.364912	28.6925	5.32856	27.0767	0.306351	27.4199	18.137	1.27254	1.9653					-0.0657702
			28.8093				27.5174
			28.9847				27.6657
		Rep. 2
		Rep. 3	27.6344	0.573331	28.244		26.4671	0.466711	25.942		2.30197
			28.7724				25.7844
			28.3252				25.5745
		Rep. 4	Undetermined	18.7336	32.4475		35.0494	1.01776	33.9455		-1.49793
			32.4475				33.0445
			Undetermined				33.7424
		Rep. 5
BRS133 2DPI	INOC	Rep. 1	29.1842	0.352717	28.7922	23.7372	26.478	0.0875519	26.4285	8.65744	2.3637	6.92243	3.71648	0.0938886	0.940427	0.92405	5.50959	-3.17384	7.9751	0.426996	0.698173	1.85824	Aceita H0: não há diferença entre os trat alfa=5%
			28.5004				26.48
			28.6919				26.3274
		Rep. 2	40	0	40		24.4482	0.233548	24.3912		15.6088			11.4877	0.00054471
			40				24.5909
			40				24.1344
		Rep. 3	29.5744	1.4202	30.8486		28.0854	0.456873	29.6518		1.19682			0.337922	0.801662
			32.3797				28.8714
			30.5917				28.882
		Rep. 4
		Rep. 5	30.3684	3.50279	33.0766		31.4735	0.270788	31.2464		1.83014			-1.02363	1.95357
			31.8291				30.9467
			37.0324				31.3192
	MOC	Rep. 1	29.8717	0.373627	30.1211	2.27238	27.8956	0.145999	27.8513	0.211235	2.26981	1.3536					2.33575
			30.5507				27.97
			29.9409				27.6883
		Rep. 2	Undetermined	19.1579	32.9282		28.6773	0.121648	28.8071		4.12111
			30.5616				28.9184
			35.2949				28.8257
		Rep. 3	29.8388	0.343888	29.4473		28.3469	0.210023	28.5884		0.858901
			29.1939				28.6905
			29.3093				28.7278
		Rep. 4
		Rep. 5	30.9446	0.140524	30.8497		27.8316	0.149421	27.9959		2.85377
			30.6883				28.1236
			30.9162				28.0325
BRS133 6 DPI	INOC	Rep. 1	31.9426	1.65255	32.6171	1.2635	22.8021	0.591531	23.0862	14.4824	9.53091	4.47928	2.50488	-8.18847	212.064	214409	3.05897	16.0272	2.79531e-05	-3.19919	0.0493623	1.25244	Aceita H0: não há diferença entre os trat alfa=5%
			31.4085				23.7662
			34.5002				22.6904
		Rep. 2	Undetermined	18.4931	32.0283		30.7701	0.10581	30.8195		1.20873			-17.4416	90242.3
			32.2697				30.941
			31.7868				30.7475
		Rep. 3	29.5514	0.523389	30.1558		29.613	0.18044	30.4916		-0.335845			-20.1085	516557
			30.4584				29.9702
			30.4575				29.7469
		Rep. 4	32.597	0.4384	32.4061		31.1732	0.365878	31.2066		1.19947			-19.003	250624
			31.9046				31.588
			32.7166				30.8586
		Rep. 5
	MOC	Rep. 1	40	0	40	0	22.2561	0.0544113	22.2806	1.25846	17.7194	1.12181					19.0862
			40				22.343
			40				22.2428
		Rep. 2	40	0	40		20.8209	0.46487	21.3497		18.6503
			40				21.694
			40				21.5342
		Rep. 3	40	0	40		20.2925	0.369279	20.2274		19.7726
			40				20.5597
			40				19.8298
		Rep. 4	40	0	40		19.8213	0.0966409	19.7976		20.2024
			40				19.6913
			40				19.8802
		Rep. 5

## Sheet: Glyma.13g194900
Glyma.13g194600																								1dpi
																								2dpi
Eficiência Alvo:	0.1	1.0958																						6dpi
Eficiência End.:	0.9958
Tratamento			Alvo	SD alvo	Media/Rep Biol.	Var alvo	Endógeno	SD end.	Media/Rep Biol.	Var Endógeno	∆Ct	∆Ct SD	SD(Mock x Inoc)	∆∆Ct	RQ	RQ média	∆Ct mean G	∆∆Ct mean G	RQ mean G	tcalc	p>tcalc	Standart Error	>0.05% Aceita Ho
PI595099 1DPI	INOC	Rep. 1	29.3398	0.23542	29.5162	15.0941	27.0693	0.0577392	27.1264	16.0938	2.38985	1.3208	1.48433	1.90992	0.839685	0.893729	3.443	-1.62787	1.16059	0.49046	0.649496	0.663815	Aceita H0: não há diferença entre os trat alfa=5%
			29.4254				27.1251
			29.7835				27.1847
		Rep. 2	24.7347	0.488624	25.2987		20.4793	0.59764	21.1692		4.12942			1.4899	0.872578
			25.5946				21.5005
			25.5667				21.5279
		Rep. 3	30.9156	0.239608	30.9582		27.8168	0.214647	29.5937		1.36447			1.16709	0.898731
			31.2162				27.9095
			30.7427				27.5001
		Rep. 4	34.8506	1.03003	34.5333		29.7356	0.150487	29.9027		4.63059			1.94161	0.837254
			33.382				30.0276
			35.3674				29.9448
		Rep. 5	34.9736	0.551695	34.6311		31.9526	0.222139	31.782		2.84909			-0.220739	1.0204
			34.9249				31.8625
			33.9946				31.5308
	MOC	Rep. 1	29.946	0.154997	30.0696	0.490448	29.2625	0.397089	29.5896	2.81923	0.479927	1.36174					1.81513
			30.0192				30.0315
			30.2435				29.4749
		Rep. 2	30.0093	1.04297	28.8132		26.0896	0.110989	26.1737		2.63952																		Glyma.13g194900	RQ Mean	RQ mean (log2)
			28.3371				26.132							-0.25208														PI595099	1dpi	0.893729	-0.16209
			28.0932				26.2995																					PI595099	2dpi	1.12585	0.17102
		Rep. 3	29.906	0.219913	30.0394		29.9386	0.413265	29.842		0.197375																	PI595099	6dpi	1.00239	0.00344247
			30.2932				30.1985																					BRS133	1dpi	0.850236	-0.234065
			29.9191				29.3891																					BRS133	2dpi	0.813492	-0.297801
		Rep. 4	29.0479	0.325959	29.3416		26.6662	0.0283172	26.6526		2.68898																	BRS133	6dpi	3.86552	1.95066
			29.6923				26.6716
			29.2845				26.62
		Rep. 5	30.5106	0.292253	30.607		27.3794	0.21308	27.5371		3.06983
			30.3751				27.7795
			30.9352				27.4525
PI595099 2DPI	INOC	Rep. 1	30.966	0.624631	30.2459	0.813778	27.6141	0.118121	27.7054	6.2109	2.54051	1.90103	2.78678	-1.53869	1.15116	1.12585	1.79096	0.299208	0.972998	-0.0480159	0.964005	1.24629	Aceita H0: não há diferença entre os trat alfa=5%
			29.9215				27.6633
			29.8502				27.8388
		Rep. 2	30.6849	0.54193	31.2577		27.3826	0.0968112	27.2714		3.98621			6.52533	0.550478
			31.7624				27.2057
			31.3256				27.226
		Rep. 3	31.3602	0.627755	30.8191		28.4567	0.0887881	30.755		0.0640871			-3.46188	1.3726
			30.1308				28.386
			30.9662				28.5624
		Rep. 4	33.709	1.27385	32.4109		32.2832	0.726529	31.666		0.744861			-1.93752	1.19393
			32.3609				31.8495
			31.1628				30.8654
		Rep. 5	33.1573	1.03078	32.1394		32.6803	0.139381	32.8069		-0.667484			-3.36988	1.3611
			31.0962				32.9563
			32.1648				32.7841
	MOC	Rep. 1	24.9417	0.295397	25.1013	6.79054	20.8902	0.119363	21.0221	21.3971	4.0792	2.65394					2.09016
			25.4422				21.0536
			24.9201				21.1226
		Rep. 2	29.351	1.10151	30.4729		32.9768	0.0325824	33.012		-2.53912
			31.5528				33.041
			30.5147				33.0181
		Rep. 3	26.8783	0.224309	27.1285		23.9329	0.305825	23.6025		3.52597
			27.3117				23.3294
			27.1954				23.5452
		Rep. 4	30.4694	0.478988	30.9982		28.1516	0.308275	28.3158		2.68238
			31.4029				28.6714
			31.1222				28.1244
		Rep. 5	30.4756	0.333771	30.5523		27.87	0.0258113	27.8499		2.7024
			30.2635				27.8208
			30.9177				27.8589
PI595099 6DPI	INOC	Rep. 1	33.0859	0.161376	33.1173	6.16711	30.0947	0.807139	31.0169	12.2911	2.10042	0.614316	1.08954	-1.00797	1.0966	1.00239	2.69899	-0.723109	1.06839	0.296809	0.781386	0.487255	Aceita H0: não há diferença entre os trat alfa=5%
			32.974				31.3617
			33.2921				31.5944
		Rep. 2	30.9568	0.793185	31.3949		29.4593	0.11915	29.3284		2.06648			0.395692	0.964448
			30.9173				29.2263
			32.3105				29.2995
		Rep. 3	26.9329	0.459277	27.4511		22.6031	0.336696	26.441		1.01009			0.449019	0.959754
			27.6126				23.2372
			27.8078				22.7238
		Rep. 4	29.1065	0.454127	29.4722		26.6443	0.13476	26.7534		2.71876			1.11874	0.902716
			29.9805				26.9041
			29.3296				26.7119
		Rep. 5	31.8286	1.5553	33.2625		31.0182	0.377736	31.2496		2.01291			-0.926216	1.08843
			34.9159				31.6855
			33.0429				31.0451
	MOC	Rep. 1	28.071	0.479306	28.6192	1.81726	25.2213	0.251298	25.5108	4.67592	3.10839	1.05433					1.97588
			28.9592				25.673
			28.8274				25.638
		Rep. 2	31.4792	0.635249	30.746		28.8131	0.247259	29.0752		1.67079
			30.3958				29.3043
			30.3628				29.1081
		Rep. 3	31.7476	0.569715	32.0228		31.2499	0.1905	31.4617		0.561075
			32.6778				31.619
			31.6429				31.5162
		Rep. 4	29.3006	0.0732628	29.3774		27.6849	0.159832	27.7774		1.60003
			29.3852				27.9619
			29.4465				27.6853
		Rep. 5	30.6732	0.254441	30.9604		27.8594	0.154844	28.0213		2.93913
			31.1578				28.1679
			31.0502				28.0365
BRS133 -1DPI	INOC	Rep. 1	30.5069	1.33933	30.5731	2.59273	26.5545	0.207474	26.7891	3.41998	3.78399	3.1458	5.75277	-1.09115	1.10498	0.850236	5.64625	-2.38064	1.24333	0.185068	0.86218	2.57272	Aceita H0: não há diferença entre os trat alfa=5%
			31.9443				26.8644
			29.2681				26.9484
		Rep. 2	30.7328	1.51953	32.2362		28.1558	0.120953	28.2836		3.95259			6.6983	0.541836
			33.7714				28.2985
			32.2043				28.3964
		Rep. 3	30.0363	1.35247	31.5063		27.4753	0.291788	26.4835		5.0228			0.701506	0.937839
			31.7848				27.226
			32.6979				26.8937
		Rep. 4	31.7004	2.06347	32.5681		27.5795	0.117161	27.7139		4.85416			5.14309	0.624681
			31.0801				27.768
			34.9237				27.7943
		Rep. 5	34.4119	0.782327	34.888		23.0694	0.496632	23.5554		11.3325			-0.448116	1.04185
			34.4611				24.062
			35.7909				23.535
	MOC	Rep. 1	31.5649	1.29531	32.2951	3.69925	27.0767	0.306351	27.4199	26.0255	4.87514	5.57809					3.26561
			33.7906				27.5174
			31.5297				27.6657
		Rep. 2	16.8027	10.6862	28.9183		31.5458	0.104285	31.664		-2.74571
			37.002				31.7029
			32.9501				31.7432
		Rep. 3	29.7543	0.861098	30.2633		26.4671	0.466711	25.942		4.3213
			31.2575				25.7844
			29.7781				25.5745
		Rep. 4	Undetermined	19.4316	33.6565		35.0494	1.01776	33.9455		-0.288938
			33.6565				33.0445
			Undetermined				33.7424
		Rep. 5	32.0138	0.612211	32.6559		20.4205	0.40161	20.8753		11.7807
			33.2331				21.024
			32.7209				21.1813
BRS133 2DPI	INOC	Rep. 1	30.6568	1.36355	31.2281	6.28758	26.478	0.0875519	26.4285	8.65744	4.79963	1.94554	1.69196	3.01412	0.759006	0.813492	5.78299	-2.60301	1.26888	0.769232	0.49777	0.845978	Aceita H0: não há diferença entre os trat alfa=5%
			30.2431				26.48
			32.7844				26.3274
		Rep. 2	31.351	1.01637	32.4547		24.4482	0.233548	24.3912		8.06358			4.29587	0.675024
			33.352				24.5909
			32.6612				24.1344
		Rep. 3	29.81	3.09679	33.0987		28.0854	0.456873	29.6518		3.44694			1.11538	0.902994
			35.9589				28.8714
			33.5273				28.882
		Rep. 4
		Rep. 5	36.8085	0.504711	37.0294		31.4735	0.270788	31.2464		5.78294			0.947814	0.916943
			36.6728				30.9467
			37.6069				31.3192
	MOC	Rep. 1	27.8224	1.64578	29.6368	2.24483	27.8956	0.145999	27.8513	160.457	1.78551	1.38435					3.17998
			31.0334				27.97
			30.0546				27.6883
		Rep. 2	31.1603	1.86305	32.5748		28.6773	0.121648	28.8071		3.76771
			31.8784				28.9184
			34.6858				28.8257
		Rep. 3	30.7335	0.633533	30.92		28.3469	0.210023	28.5884		2.33156
			31.6258				28.6905
			30.4006				28.7278
		Rep. 4
		Rep. 5	28.827	3.96595	32.831		27.8316	0.149421	27.9959		4.83512
			36.7578				28.1236
			32.9083				28.0325
BRS133 6 DPI	INOC	Rep. 1	33.7414	0.384355	34.1788	15.5084	22.8021	0.591531	23.0862	10.8624	11.0926	7.07612	4.95885	-0.805593	1.07648	3.86552	-0.200164	11.9996	0.333611	-1.08218	0.34005	2.21766	Aceita H0: não há diferença entre os trat alfa=5%
			34.3324				23.7662
			34.4626				22.6904
		Rep. 2	13.3901	11.4009	26.5084		30.7701	0.10581	30.8195		-4.31116			-15.5734	4.15673
			32.1116				30.941
			34.0234				30.7475
		Rep. 3	32.8438	12.34	24.7847		29.613	0.18044	30.0188		-5.23407			-20.5888	6.57686
			10.5785				29.9702
			30.9318				29.7469
		Rep. 4	36.4931	18.3713	26.0916		31.1732	0.365878	31.2066		-5.11503			-19.8565	6.15071
			4.87949				31.588
			36.9021				30.8586
		Rep. 5	31.5269	0.504051	30.993		27.9989	0.612788	28.6683		2.32476			-3.41583	1.36683
			30.9269				29.2016
			30.5253				28.8043
	MOC	Rep. 1	33.7414	0.384355	34.1788	1.16886	22.2561	0.0544113	22.2806	13.6752	11.8982	3.81784					11.7994
			34.3324				22.343
			34.4626				22.2428
		Rep. 2	32.3233	0.321482	32.612		20.8209	0.46487	21.3497		11.2623
			32.9584				21.694
			32.5542				21.5342
		Rep. 3	34.6051	1.0102	35.5821		20.2925	0.369279	20.2274		15.3547
			36.6225				20.5597
			35.5185				19.8298
		Rep. 4	34.5075	0.083369	34.5391		19.8213	0.0966409	19.7976		14.7415
			34.6336				19.6913
			34.4761				19.8802
		Rep. 5	33.2654	1.29175	34.6329		28.7646	0.111369	28.8923		5.74059
			35.8325				28.9429
			34.8008				28.9694
